1 **Viral mimicry of p65/RelA transactivation domain to inhibit NF- $\kappa$ B activation**

2

3 Jonas D. Albarnaz<sup>1\*</sup>, Hongwei Ren<sup>1†</sup>, Alice A. Torres<sup>1</sup>, Evgeniya V. Shmeleva<sup>1‡</sup>, Carlos A.  
4 Melo<sup>2</sup>, Andrew J. Bannister<sup>2</sup>, Matthew P. Brember<sup>1</sup>, Betty Y.-W. Chung<sup>1</sup>, Geoffrey L. Smith<sup>1\*</sup>

5 <sup>1</sup>Department of Pathology, University of Cambridge, Cambridge CB2 1QP, UK

6 <sup>2</sup>The Gurdon Institute, University of Cambridge, Cambridge CB2 1QN, UK

7

8 \*Corresponding authors: [gls37@cam.ac.uk](mailto:gls37@cam.ac.uk) (GLS); [jd732@cam.ac.uk](mailto:jd732@cam.ac.uk) (JDA)

9

10 †Present address: Department of Immunology and Inflammation, Imperial College  
11 London, Hammersmith Campus, Du Cane Road, London W12 0NN, UK

12 ‡Present address: Department of Obstetrics and Gynaecology, University of Cambridge, Box  
13 223, Level 2, The Rosie Hospital, Robinson Way, Cambridge CB2 2SW, UK

14

15 Running title: Viral inhibition of NF- $\kappa$ B via molecular mimicry

16

17 Key words: NF- $\kappa$ B, p65, F14, molecular mimicry, CBP, BRD4, poxvirus, vaccinia virus,  
18 immune evasion, virulence, HPV16 E7, HSV-1 VP16

19

20 ABSTRACT

21 Sensing of virus infection activates NF- $\kappa$ B to induce the expression of interferons, cytokines  
22 and chemokines to initiate the antiviral response. Viruses antagonise these antiviral defences  
23 by interfering with immune sensing and blocking the actions of antiviral and inflammatory  
24 molecules. Here, we show that a viral protein mimics the transactivation domain of the p65  
25 subunit of NF- $\kappa$ B. The C terminus of vaccinia virus (VACV) protein F14 (residues 51-73)  
26 activates transcription when fused to a DNA-binding domain-containing protein and F14  
27 associates with NF- $\kappa$ B co-activator CBP, disrupting p65-CBP interaction. Consequently, F14  
28 diminishes CBP-mediated acetylation of p65 and the downstream recruitment of the  
29 transcriptional regulator BRD4 to the promoter of the NF- $\kappa$ B-responsive genes *CXCL10* and  
30 *CCL2*, hence inhibiting their expression. Conversely, the recruitment of BRD4 to the promoters  
31 of *NFKBIA*, which encodes the inhibitor of NF- $\kappa$ B (I $\kappa$ B $\alpha$ ), and *CXCL8* remains unaffected in  
32 the presence of either F14 or JQ1, a competitive inhibitor of BRD4 bromodomains, indicating  
33 its recruitment is acetylation-independent. Therefore, unlike other viral NF- $\kappa$ B antagonists, F14  
34 is a selective inhibitor of NF- $\kappa$ B-dependent gene expression. A VACV strain lacking F14  
35 showed that it contributes to virulence in an intradermal model of infection. Our results uncover  
36 a mechanism by which viruses disarm the antiviral defences through molecular mimicry of a  
37 conserved host protein and provide insight into the regulation of NF- $\kappa$ B-dependent gene  
38 expression by BRD4.

39

## 40 INTRODUCTION

41 Viruses provide constant selective pressure shaping the evolution of the immune systems of  
42 multicellular organisms [1-3]. At the cellular level, an array of receptors detects virus-derived  
43 molecules, or more broadly pathogen-associated molecular patterns (PAMPs), allowing the  
44 recognition of invading viruses and the activation of a gene expression programme that  
45 initiates the antiviral response [reviewed by [4, 5]]. The induced gene products, which include  
46 interferons, cytokines and chemokines, are secreted and function as signals to activate more  
47 specialised immune cells and attract them to the site of infection, thereby generating  
48 inflammation [reviewed by [6-8]]. This coordinated inflammatory response evolved to achieve  
49 the control and (or) elimination of the infection, and the establishment of an immunological  
50 memory against future infection [reviewed by [4, 9]].

51 Engagement of pattern recognition receptors (PRRs) by their cognate PAMPs activates  
52 multiple transcription factors, including nuclear factor kappa light-chain enhancer of activated  
53 B cells (NF- $\kappa$ B) [reviewed by [10-12]]. NF- $\kappa$ B is a homo- or heterodimer of Rel proteins, with  
54 the heterodimer of p50 (also known as NF- $\kappa$ B1 or NFKB1) and p65 (also known as RelA or  
55 RELA) being the prototypical form of NF- $\kappa$ B [13]. Through an interface formed by the Rel  
56 homology domains of the two Rel subunits, NF- $\kappa$ B recognises and binds to a consensus DNA  
57 sequence in the promoter elements and enhancers of target genes [reviewed by [10], [14]].  
58 NF- $\kappa$ B-responsive gene products include inflammatory mediators, such as cytokines,  
59 chemokines and cell adhesion molecules, as well as proteins involved in other immune  
60 processes, like MHC molecules, growth factors and regulators of apoptosis [15, 16]. Moreover,  
61 cytokines, such as interleukin (IL)-1 and tumour necrosis factor (TNF)- $\alpha$ , also trigger NF- $\kappa$ B  
62 activation upon engagement of their receptors on the cell surface [reviewed by [10, 11]].

63 In resting conditions, NF- $\kappa$ B remains latent in the cytoplasm bound to the inhibitor of  $\kappa$ B (I $\kappa$ B)  
64  $\alpha$  (also known as NFKBIA) [17, 18]. Upon activation, the I $\kappa$ B kinase (IKK) complex  
65 phosphorylates I $\kappa$ B $\alpha$ , triggering its ubiquitylation and subsequent proteasomal degradation,  
66 thus releasing NF- $\kappa$ B to accumulate in the nucleus [18] [reviewed by [10, 11]]. In the nucleus,  
67 NF- $\kappa$ B interacts with chromatin remodelling factors, coactivators and general transcription  
68 factors to activate the transcription of antiviral and inflammatory genes by RNA polymerase  
69 (RNAP) II [14, 19-24]. The specificity and kinetics of NF- $\kappa$ B-dependent gene expression is  
70 determined by several factors including dimer composition [25], cooperation with other  
71 transcription factors [24], duration of the stimulus [26, 27], cell type [28, 29] and chromatin  
72 context on the promoters of target genes [14, 30, 31]. In addition, NF- $\kappa$ B undergoes multiple  
73 posttranslational modifications, in the cytoplasm or nucleus, that control its transcriptional  
74 activity through interactions with coactivators and basal transcription machinery [reviewed by  
75 [13, 32, 33]].

76 Following the stimulation with PAMPs or inflammatory cytokines (e.g., TNF- $\alpha$ ), two conserved  
77 residues in p65 are phosphorylated: S276, mainly by protein kinase A (PKA), and S536 within  
78 the transactivation domain (TAD), by the IKK complex [34, 35]. Phosphorylation of either site  
79 enhances NF- $\kappa$ B transcriptional activity by promoting the interaction with the coactivators  
80 CREB-binding protein (CBP) or its paralogue p300 (also known as CREBBP and EP300,  
81 respectively). These coactivators acetylate both p65 at K310 and histones on the target gene  
82 promoters to allow transcription initiation and elongation to proceed [35-38]. The bromodomain  
83 and extraterminal domain (BET) protein BRD4 docks onto acetylated p65-K310, via its two  
84 bromodomains, and subsequently recruits positive transcription elongation factor b (P-TEFb)  
85 to drive transcription of inflammatory genes by RNAP II [39]. This latter study highlighted the  
86 complexity of the gene expression programme downstream of NF- $\kappa$ B, with subsets of genes  
87 differentially expressed depending on the transcriptional regulatory events following NF- $\kappa$ B

88 recruitment to DNA [[39-41]; reviewed by [42]]. Targeting of the nuclear activity of NF- $\kappa$ B and  
89 its coactivator CBP by viral proteins has been described as a strategy to antagonise antiviral  
90 responses (e.g. high-risk human papillomavirus (HPV) E6 protein [43] and herpes simplex  
91 virus (HSV) type 1 protein VP16 [44]). However, these studies do not elucidate in detail how  
92 viral interference with NF- $\kappa$ B in the nucleus affects induction of the inflammatory genes by this  
93 transcription factor. Furthermore, there are contradictory reports regarding the interaction  
94 between VP16 and CBP [21, 44].

95 The confrontations between viruses and hosts leave genetic signatures over their evolutionary  
96 histories [3, 45]. On one hand, host innate immune factors display strong signs of positive  
97 selection to adapt to the pressure posed by viruses [reviewed by [46]]. On the other hand,  
98 viruses acquire multiple mechanisms to antagonise host innate immunity, such as mimicking  
99 host factors to disrupt their functions in the antiviral response or to subvert them for immune  
100 evasion [reviewed by [46, 47]]. Poxviruses have been a paradigm in the study of virus-host  
101 interactions [reviewed by [48]]. Their large DNA genomes encode a plethora of proteins that  
102 antagonise the host antiviral response. Some poxvirus proteins show structural similarity to  
103 host proteins and modulate innate immune signalling during infection [reviewed by [49, 50]].  
104 For instance, vaccinia virus (VACV), the smallpox vaccine and the prototypical poxvirus,  
105 encodes a family of proteins sharing structural similarity to cellular Bcl-2 proteins despite very  
106 limited sequence similarity. Viral Bcl-2-like proteins have evolved to perform a wide range of  
107 functions, such as inhibition of NF- $\kappa$ B activation [reviewed by [51]]. VACV protein A49,  
108 notwithstanding its Bcl-2 fold, also mimics the I $\kappa$ B $\alpha$  phosphodegron that is recognised by the  
109 E3 ubiquitin ligase  $\beta$ -TrCP, thereby blocking I $\kappa$ B $\alpha$  ubiquitylation [52, 53]. Upon NF- $\kappa$ B  
110 activation, the IKK complex phosphorylates A49 to create the complete phosphodegron mimic  
111 that then engages  $\beta$ -TrCP to prevent I $\kappa$ B $\alpha$  ubiquitylation [54].

112 Despite the existence of multiple inhibitors of NF- $\kappa$ B from VACV, virus strains lacking individual  
113 inhibitors have reduced virulence in mouse models, arguing against their functional  
114 redundancy [reviewed by [55, 56]]. Therefore, the detailed study of the mechanisms  
115 underpinning the antagonism of NF- $\kappa$ B by VACV and other poxviruses offers an opportunity  
116 to dissect the signalling pathways leading to NF- $\kappa$ B activation and their relative contributions  
117 to antiviral immunity. Previous work from our laboratory predicted that VACV encodes  
118 additional inhibitors of NF- $\kappa$ B because a mutant VACV strain (vv811 $\Delta$ A49) lacking the function  
119 of all known inhibitors of NF- $\kappa$ B still suppresses NF- $\kappa$ B-dependent gene expression without  
120 preventing NF- $\kappa$ B translocation to the nucleus [57]. Here, we mapped this NF- $\kappa$ B inhibitory  
121 activity to the open reading frame (ORF) *F14L*, which is conserved across all orthopoxviruses,  
122 including the human pathogens variola, monkeypox and cowpox viruses. We show that the  
123 orthopoxvirus protein F14 inhibits NF- $\kappa$ B and a VACV strain lacking F14 has reduced virulence  
124 in a mouse model. Mechanistically, the F14 C terminus mimics the TAD of p65 and  
125 outcompetes p65 for binding to the coactivator CBP. As a consequence, F14 reduces p65  
126 acetylation and downstream molecular events required for the activation of a subset of NF-  
127  $\kappa$ B-responsive inflammatory genes. The selectivity of F14 inhibition makes it unique among  
128 known viral antagonists of NF- $\kappa$ B. The dissection of the mechanism of action of F14 also  
129 revealed that the transcriptional regulator BRD4 can be recruited to the chromatin in an  
130 acetylation-independent manner.

131

## 132 RESULTS

### 133 *Vaccinia virus protein F14 is a virulence factor that inhibits NF- $\kappa$ B activation*

134 The prediction that VACV encodes additional inhibitor(s) of NF- $\kappa$ B that function downstream  
135 of p65 translocation to the nucleus [57] prompted a search for nuclear NF- $\kappa$ B inhibitors. VACV  
136 strain vv811 $\Delta$ A49 lacks 56 ORFs, but retains the inhibitor(s) [57, 58], and so its encoded  
137 proteins were screened by bioinformatics for ones that met the following criteria: (i) early  
138 expression, based on previous VACV transcriptome studies [59, 60]; (ii) predicted not to be  
139 involved in replication and/or morphogenesis; (iii) being poorly characterised; (iv) the presence  
140 of putative nuclear localisation signals (NLS) or predicted molecular mass <40 kDa that would  
141 allow diffusion into the nucleus [61]; and (v) the presence of domains indicative of function.  
142 The genomic position of the ORF and its conservation among orthopoxviruses were also  
143 considered given that VACV immunomodulatory genes are located towards the genome  
144 termini and often are less conserved than genes having functions in virus replication [62].

145 This approach yielded a list of seven ORFs, namely *F6L*, *F7L*, *F14L*, *A47L*, *B6R*, *B11R* and  
146 *B12R*. The proteins encoded by these ORFs were tested for inhibition of NF- $\kappa$ B activation in  
147 an NF- $\kappa$ B luciferase reporter gene assay. GFP and VACV protein N2, an interferon regulatory  
148 factor (IRF) 3 inhibitor [63], were used as negative controls, whereas VACV protein B14, a  
149 known inhibitor of NF- $\kappa$ B [64], was used as positive control. Protein F14 inhibited TNF- $\alpha$ - and  
150 IL-1 $\beta$ -stimulated NF- $\kappa$ B activity in HEK 293T cells in a dose-dependent manner (Figure 1A, B  
151 and Figure S1). This inhibitory activity was specific for the NF- $\kappa$ B pathway, because F14 did  
152 not affect IFN- $\alpha$ -stimulated IFN- $\alpha/\beta$  receptor (IFNAR)/signal transducer and activator of  
153 transcription (STAT) or phorbol 12-myristate 13-acetate (PMA)-stimulated mitogen-activated  
154 protein kinase (MAPK)/AP-1 pathways (Figure 1C, D). The inhibitory activity was exerted  
155 despite the lower levels of F14 when compared to protein B14 (Figure 1E) [64]. Conversely,  
156 VACV protein C6 suppressed type I IFN signalling and B14 upregulated AP-1 activity, as  
157 observed previously (Figure 1C, D) [65, 66].

158 The virulence of VACV strains lacking specific genes has been tested mostly in intranasal or  
159 intradermal murine models [reviewed by [55, 56]]. Deletion of genes encoding VACV  
160 immunomodulatory proteins may give a phenotype in either, neither or both models. To  
161 evaluate if loss of F14 expression affected virulence, a recombinant VACV lacking F14 was  
162 generated, termed  $v\Delta$ F14. Intradermal injection of the ear pinnae of mice with  $v\Delta$ F14 produced  
163 smaller lesions, and reduced virus titres at 7 and 10 d post-infection (p.i.) (Figure 1F, G)  
164 compared to wildtype virus ( $v$ F14) and a revertant strain ( $v$ F14-Rev), generated by reinserting  
165 F14 into  $v\Delta$ F14 at its natural locus (Figure 1F, G). Attenuation of  $v\Delta$ F14 in the intradermal  
166 mouse model correlated with reduced viral titres in the infected ears 7 and 10 d p.i., but not 3  
167 d p.i. (Figure 1G). In contrast, in an intranasal mouse model,  $v\Delta$ F14 caused the same extent  
168 of body mass loss as wildtype and revertant controls (Figure S2). In cell culture,  $v$ F14,  $v\Delta$ F14  
169 and  $v$ F14-Rev displayed no differences in replication and plaque size (Figure S3). Altogether,  
170 these experiments showed that F14 is not essential for virus replication but contributes to  
171 virulence.

172 Previous analyses of the VACV transcriptome showed that the *F14L* ORF is transcribed and  
173 translated early during infection [59, 60, 67]. This was consistent with an upstream typical  
174 early promoter and a transcription termination motif T<sub>5</sub>NT downstream of the stop codon [68,  
175 69]. To investigate F14 expression during infection, a VACV strain was constructed in which  
176 F14 was tagged with a C-terminal TAP tag. The  $v$ F14-TAP strain replicated normally (Figure  
177 S3) and immunoblotting showed F14 protein expression was detected from 4 h p.i. and peaked  
178 by 8 h p.i., matching the accumulation of the early VACV protein C6 (Figure 1H) [70]. F14  
179 levels were notably low either when expressed ectopically (Figure 1E) or during infection

180 (Figure 1H). This might explain why F14 was not detected in our recent quantitative proteomic  
181 analysis of VACV infection, which detected about 80% of the predicted VACV proteins [71].  
182 Pharmacological inhibition of virus DNA replication with cytosine arabinoside (AraC) did not  
183 affect F14 protein levels, consistent with early expression, whereas late protein D8 was  
184 inhibited (Figure 1H).

185 The existence of multiple VACV inhibitors of NF- $\kappa$ B that each contribute to virulence indicates  
186 they are not redundant. To test if F14 affects NF- $\kappa$ B activation during infection, we deleted  
187 F14 from the vv811 $\Delta$ A49 strain that lacks other known inhibitors of NF- $\kappa$ B [57] and then  
188 infected an NF- $\kappa$ B reporter cell line [57]. As shown previously, vv811 $\Delta$ A49 inhibited NF- $\kappa$ B to  
189 a reduced extent when compared to the parental vv811 strain (Figure 1I) [57] and deletion of  
190 *F14L* from vv811 $\Delta$ A49 reduced NF- $\kappa$ B inhibition further (Figure 1I). Immunoblotting confirmed  
191 equal infection with these viruses (Figure 1J). Notably, vv811 $\Delta$ A49 $\Delta$ F14 still suppressed NF-  
192  $\kappa$ B activation considerably, which might be explained by: (i) the existence of additional virally-  
193 encoded inhibitors that cooperate to inhibit NF- $\kappa$ B in the nucleus, or (ii) the actions of D9 and  
194 D10 decapping enzymes to reduce host mRNA [72, 73].

195

#### 196 *F14 inhibits NF- $\kappa$ B at or downstream of p65*

197 To dissect how F14 functions, its impact on three hallmarks of NF- $\kappa$ B signalling were studied:  
198 namely, degradation of I $\kappa$ B $\alpha$ , phosphorylation of p65 at S536 and p65 nuclear translocation.  
199 A cell line that expresses F14 inducibly upon addition of doxycycline was used to study the  
200 degradation of I $\kappa$ B $\alpha$ , and phosphorylation and nuclear translocation of p65 following  
201 stimulation with TNF- $\alpha$ . I $\kappa$ B $\alpha$  degradation was evident 15 min after stimulation and its re-  
202 synthesis had started by 30 min, but neither process was influenced by F14 (Figure 2A). F14  
203 also did not affect phosphorylation of p65 at S536 (Figure 2A) or p65 translocation into the  
204 nucleus as measured by immunofluorescence (Figure 2B and Figure S4). In contrast, VACV  
205 protein B14 inhibited translocation efficiently as reported [64], and VACV protein C6, an IFN  
206 antagonist [65, 70], did not (Figure 2B).

207 Next, the NF- $\kappa$ B inhibitory activity of F14 was tested by reporter gene assay following pathway  
208 activation by p65 overexpression. In contrast to B14, F14 inhibited p65-mediated activation in  
209 a dose-dependent manner without affecting p65 levels (Figure 2C). Altogether, these results  
210 showed that F14 blocks NF- $\kappa$ B in the nucleus at or downstream of p65. F14 thus fits the criteria  
211 described previously for the unknown inhibitor of NF- $\kappa$ B encoded by VACV and expressed by  
212 vv811 $\Delta$ A49 [57].

213

#### 214 *F14 orthologues are conserved in orthopoxviruses and mimic the p65 transactivation domain*

215 Poxvirus immunomodulatory proteins are generally encoded in the variable genome termini,  
216 share lower sequence identity and show genus-specific distribution [62]. Even among  
217 orthopoxviruses, only a few of the immunomodulatory genes are present in all virus species  
218 [62]. Nonetheless, Viral Orthologous Clusters [74] and protein BLAST searches found  
219 orthologues of VACV F14 in all orthopoxviruses, with 70.7% to 98.6% amino acid (aa) identity  
220 (Figure 3A). The *F14L* orthologue from cowpox virus, *CPXV062*, is expressed during infection  
221 by two different strains of cowpox virus, as shown by RNA sequencing [75]. *F14L* orthologues  
222 from monkeypox and variola viruses are also likely to be expressed during infection, because  
223 the nucleotide sequences surrounding the ORFs contained highly conserved transcriptional  
224 regulatory sequences, i.e., canonical poxvirus early promoters and transcription termination  
225 signals [68]. Furthermore, historical strains of variola virus from the 10<sup>th</sup> and 17<sup>th</sup> centuries CE

226 also encoded *F14L* orthologues with conserved flanking transcription regulatory sequences  
227 [76, 77].

228 The C-terminal half of F14 was more conserved and included a predicted coiled-coil region  
229 (aa 34-47), the only structural motif predicted via bioinformatic analyses. However, the Phyre2  
230 algorithm [78] predicted the C-terminal aa 55 to 71 to adopt an  $\alpha$ -helical secondary structure  
231 similar to that of aa 534-546 of p65 in complex with the PH domain of human general  
232 transcription factor Tfb1, or aa 534-546 of p65 in complex with the KIX domain of NF- $\kappa$ B  
233 coactivator CBP [79]. The F14 aa similarity was striking despite the low confidence of the  
234 Phyre2 model (41.4%). When aligned to p65 C-terminal aa 521-551, F14 shared 39% aa  
235 identity and 61% aa similarity, including the conservation of a  $\Phi$ XX $\Phi$  $\Phi$  motif and an upstream  
236 acidic residue, both essential for NF- $\kappa$ B transcriptional activity [79-81]. The C terminus of p65  
237 harbours its transactivation domain (TAD), which is divided into two subdomains that have  
238 independent transcriptional activity: TA<sub>1</sub> (aa 521 to 551) and TA<sub>2</sub> (aa 428 to 521) [22, 82]. TA<sub>1</sub>  
239 contributes at least 85% of p65 transcriptional activity and interacts directly with CBP [22, 79,  
240 82]. Notably, in F14 the position equivalent to S536 in p65, which is phosphorylated upon NF-  
241  $\kappa$ B activation [34, 38], is occupied by the negatively charged residue D59 (Figure 3A). The  
242 negative charge of F14-D59 closely resembles the negative charge conferred by  
243 phosphorylation of p65-S536 during NF- $\kappa$ B activation [34].

244 These observations and the key role of CBP in NF- $\kappa$ B-dependent gene activation [20]  
245 prompted investigation of whether F14 could interact with CBP. Immunoprecipitation (IP) of  
246 HA-tagged F14 co-precipitated CBP-FLAG from HEK 293T cells (Figure 3B). Reciprocal IP  
247 experiments showed that ectopic CBP co-precipitated F14-HA, but not GFP-HA, with or  
248 without prior TNF- $\alpha$  stimulation (Figure 3C). These interactions were also seen at endogenous  
249 levels in both HEK 293T and HeLa cells infected with vF14-TAP. F14, but not C6, co-  
250 precipitated endogenous CBP (Figure 3D).

251 To test whether the C terminus of F14 mediated transactivation via its binding to CBP, F14 aa  
252 51 to 73 were fused to the C terminus of a p65 mutant lacking the TA<sub>1</sub> subdomain of the TAD  
253 ( $\Delta$ TA<sub>1</sub>) and the fusion protein was tested in a NF- $\kappa$ B reporter gene assay. Compared to  
254 wildtype p65, the p65 $\Delta$ TA<sub>1</sub> mutant was impaired in its transactivating activity, which was  
255 restored to wildtype levels upon fusion to F14<sub>51-73</sub> (Figure 3E). This result argues strongly that  
256 the C terminus of F14 mimics the TA<sub>1</sub> of p65 and this mimicry might explain how F14 inhibits  
257 NF- $\kappa$ B activation.

258

#### 259 *F14 outcompetes NF- $\kappa$ B for binding to CBP*

260 The similarity between the C termini of F14 and p65 led us to investigate if conserved aa  
261 residues contributed to the NF- $\kappa$ B inhibitory activity of F14. Based on the structure of CBP KIX  
262 domain in complex with p65 TA<sub>1</sub> [79], residues of the F14 TAD-like domain corresponding to  
263 residues of p65 important for its transcriptional activity and binding to CBP were mutated.  
264 Three sites were altered by site-directed mutagenesis: the dipeptide D62/63, and the following  
265 L65 and L68 of the  $\Phi$ XX $\Phi$  $\Phi$  motif. F14 L65A or L68A still inhibited NF- $\kappa$ B (Figure 4A), although  
266 the L65A mutant was slightly impaired. In contrast, mutation of D62/63 to either alanine  
267 (D62/63A) or lysine (D62/63K) abolished the inhibitory activity (Figure 4A). Protein levels were  
268 comparable across the different F14 mutants (Figure 4A). The loss of NF- $\kappa$ B inhibitory activity  
269 of D62/63A and D62/63K mutants correlated with their reduced capacity to co-precipitate CBP,  
270 whereas L65A and L68A mutants co-precipitated CBP to the same extent as wildtype F14  
271 (Figure 4B). The mutation of the negatively charged D62/63 to positively charged lysine  
272 residues was more efficient in disrupting the interaction between F14 and CBP than only

273 abolishing the charge (Figure 4B). Collectively, these results highlight the importance of the  
274 negatively charged dipeptide D62/63 within the TAD-like domain for NF- $\kappa$ B inhibition by F14.

275 Next, we tested if F14 could disrupt the interaction of p65 with its coactivator CBP [20]. HEK  
276 293T cells were transfected with vectors expressing p65 and CBP or RIG-I (negative control),  
277 and VACV proteins F14 or C6. The amount of p65-HA immunoprecipitated by ectopic CBP  
278 was reduced by increasing amounts of F14 but not C6 (Figure 5A, B). Quantitative analysis  
279 showed equivalent ectopic CBP immunoprecipitation with or without F14 (Figure 5C).  
280 Furthermore, the mutation D62/63K diminished the capacity of F14 to disrupt the interaction  
281 of CBP and p65 (Figure 5D). This observation correlated well with the reduced capacity of the  
282 D62/63K mutant to co-precipitate CBP (Figure 4B).

283

#### 284 *F14 suppresses expression of a subset of NF- $\kappa$ B-responsive genes*

285 To address the impact of F14 on the induction of endogenous NF- $\kappa$ B-responsive genes by  
286 TNF- $\alpha$ , the cell line inducibly expressing F14 was utilised. NF- $\kappa$ B-responsive genes display  
287 different temporal kinetics upon activation, with “early” gene transcripts peaking between 30 –  
288 60 min after stimulation before declining, whilst “late” gene transcripts accumulate slowly and  
289 progressively, peaking 3 h post stimulation [15, 16]. When F14 expression was induced,  
290 mRNAs of *NFKBIA* and *CXCL8* “early” genes had equivalent induction kinetics compared to  
291 uninduced cells (Figure 6A, B, I). The lack of inhibition of F14 on the expression of *NFKBIA*  
292 mRNA is in agreement with the previous finding that the re-synthesis of I $\kappa$ B $\alpha$  (*NFKBIA* protein  
293 product) is unaffected by F14 after its proteasomal degradation induced by TNF- $\alpha$  (Figure 2A).  
294 Conversely, F14 induction inhibited the accumulation of the mRNAs of *CCL2* and *CXCL10*  
295 “late” genes in response to TNF- $\alpha$  (Figure 6D, E). Similar results were observed when the  
296 F14-expressing cell line was compared to the cell line inducibly expressing C6 (Figure S5).

297 *CXCL8* and *CXCL10* encode chemokines CXCL8 and CXCL10 (also known as IL-8 and IP-  
298 10, respectively). Following induction of VACV protein expression, the levels of these secreted  
299 chemokines were measured by ELISA and showed that levels of CXCL10, but not CXCL8,  
300 was inhibited by F14. In contrast, the secretion of both chemokines was inhibited, or  
301 unaffected, by VACV proteins B14 or C6, respectively, as expected (Figure 6C, F, J, I and  
302 Figure S6). Thus, unlike other VACV NF- $\kappa$ B inhibitors, F14 is selective and inhibits only a  
303 subset of NF- $\kappa$ B-responsive genes.

304 Differential regulation of transcription activation downstream of NF- $\kappa$ B has been ascribed to  
305 the recruitment of BRD4 to some NF- $\kappa$ B-dependent inflammatory genes [39]. Via its  
306 bromodomains 1 and 2, BRD4 docks onto acetylated histones and non-histone proteins and  
307 recruits transcriptional regulatory complexes to chromatin [reviewed by [83, 84]]. The specific  
308 recognition of acetyl-lysine residues by BRD4 is competitively inhibited by small-molecule BET  
309 bromodomain inhibitors, such as JQ1 [85]. Therefore, to gain more insight into the mechanism  
310 underpinning the selective inhibition of inflammatory genes by F14, the effect of JQ1 on the  
311 inducible expression of CXCL8 and CXCL10 was investigated. Following TNF- $\alpha$  stimulation,  
312 JQ1 inhibited the secretion of CXCL10, but not CXCL8, phenocopying the selective inhibition  
313 of inflammatory protein expression by F14 (Figure 6G, H).

314

#### 315 *Acetylation of p65 and recruitment of BRD4 are inhibited by F14*

316 Posttranslational modifications of p65 accompany NF- $\kappa$ B translocation to the nucleus and  
317 some, such as acetylation by acetyltransferases CBP and p300, are associated with increased



318 transcriptional activity [[35, 36, 38]; reviewed by [13, 32, 33]]. F14 did not interfere with the  
319 phosphorylation of p65 at S536 (Figure 2A), so the acetylation of p65-K310 was investigated.  
320 Cell lines that express F14 inducibly or contain the empty vector (EV) control were transfected  
321 with plasmids expressing p65 and CBP in the presence of the inducer, doxycycline. Although  
322 both cell lines expressed equivalent amounts of ectopic p65 and CBP, the amount of p65  
323 acetylated at K310 was greatly diminished by F14 (Figure 7A). Quantitative analysis showed  
324 acetylated p65 was reduced 90% by F14 (Figure 7B). This result, together with data in Figure  
325 5, indicated that the reduced acetylation of p65 was due to disruption of the interaction  
326 between p65 and CBP by F14.

327 Acetylated K310 on p65 serves as a docking site for the bromodomains 1 and 2 of BRD4,  
328 which then recruits P-TEFb to promote RNAP II elongation during transcription of some NF-  
329  $\kappa$ B-responsive genes [39]. The differential sensitivity of TNF- $\alpha$ -stimulated genes to the  
330 inhibition of NF- $\kappa$ B by F14 might reflect the differential requirement of p65 acetylated at K310,  
331 and the subsequent recruitment of BRD4, to activate the expression from NF- $\kappa$ B-responsive  
332 promoters [39]. This hypothesis was tested by chromatin immunoprecipitation with an anti-  
333 BRD4 antibody followed by quantitative PCR of the promoters of four representative genes:  
334 *NFKBIA* and *CXCL8*, resistant to F14 inhibition, and *CCL2* and *CXCL10*, sensitive to inhibition.  
335 BRD4 was recruited to these promoters after TNF- $\alpha$  stimulation, with BRD4 present on  
336 *NFKBIA* and *CXCL8* promoters at 1 and 5 h post-stimulation, whereas BRD4 was more  
337 enriched on *CCL2* and *CXCL10* promoters only at 5 h post-stimulation, mirroring the kinetics  
338 of mRNA accumulation (Figure 7B-F; see Figure 6A, B, D, E). In the presence of F14, the  
339 inducible recruitment of BRD4 to the *NFKBIA* and *CXCL8* promoters remained unaffected,  
340 whilst its recruitment to *CCL2* and *CXCL10* was blocked (Figure 7C). This strongly suggests  
341 that inhibition of acetylation of p65 at K310 by F14 is relayed downstream to the recruitment  
342 of BRD4 to the “F14-sensitive” promoters, but not to the “F14-resistant” promoters.

343 The BRD4 recruitment to *NFKBIA* and *CXCL8* promoters despite inhibition of p65-K310  
344 acetylation prompted investigation of whether other acetyl-lysine residues are recognised. The  
345 bromodomain-mediated docking onto acetylated lysine residues is generally accepted as  
346 responsible for the recruitment of BRD4 to the chromatin [reviewed by [83, 84]]. For instance,  
347 histone 4 acetylated on K5, K8 and K12 (H4K5/K8/K12ac) is responsible for BRD4 recruitment  
348 to NF- $\kappa$ B-responsive genes upon lipopolysaccharide stimulation [86]. The recruitment of  
349 BRD4 to the *NFKBIA*, *CXCL8*, *CCL2*, and *CXCL10* promoters was tested in the presence of  
350 the bromodomain inhibitor JQ1, by chromatin immunoprecipitation and quantitative PCR.  
351 BRD4 was still recruited to *NFKBIA* and *CXCL8* promoters after TNF- $\alpha$  stimulation in the  
352 presence of JQ1, whilst inducible recruitment to *CCL2* and *CXCL10* promoters was abolished  
353 by JQ1 (Figure 7H-K). As a control for JQ1 pharmacological activity, BRD4 recruitment to the  
354 *CCND1* gene promoter was diminished by this small-molecule inhibitor (Figure S7). *CCND1*  
355 is a BRD4 target gene that encodes the cell cycle regulator cyclin D1 and was used as a  
356 positive control [87]. Altogether, these results suggest that the inducible recruitment of BRD4  
357 to some promoters is independent of the bromodomains.

358

### 359 *F14 is unique among known viral antagonists of NF- $\kappa$ B*

360 The TAD domain of p65 belongs to the class of acidic activation domains, characterised by a  
361 preponderance of aspartic acid or glutamic acid residues surrounding hydrophobic motifs [22].  
362 VP16 is a transcriptional activator from HSV-1 that bears a prototypical acidic TAD (Figure  
363 8A) and inhibits the expression of virus-induced IFN- $\beta$  by association with p65 and IRF3 [44].  
364 Although the VP16-mediated inhibition of the IFN- $\beta$  promoter was independent of its TAD, we  
365 revisited this observation to investigate the effect of VP16 more specifically on NF- $\kappa$ B-

366 dependent gene activation. VP16 inhibited NF- $\kappa$ B reporter gene expression in a dose-  
367 dependent manner and deletion of the TAD reduced NF- $\kappa$ B inhibitory activity of VP16 about  
368 2-fold, but some activity remained (Figure 8A).

369 A search for other viral proteins that contain motifs resembling the  $\Phi$ XX $\Phi$  $\Phi$  motif present in  
370 acidic transactivation activation domains detected a divergent  $\Phi$ XX $\Phi$  $\Phi$  motif in protein E7 (aa  
371 79-83) from HPV16, with acidic residues upstream (D75) or within (E80 and D81) the motif  
372 (Figure 8B). E7 has been reported to inhibit NF- $\kappa$ B activation, in addition to its role in promoting  
373 cell cycle progression [43, 88-90]. We confirmed that HPV16 protein E7 inhibits NF- $\kappa$ B-  
374 dependent gene expression (Figure 8B). Furthermore, E7 mutants harbouring aa substitutions  
375 that inverted the charge of D75 (D75K) or added a positive charge to the otherwise  
376 hydrophobic L83 (L83R) were impaired in their capacity to inhibit NF- $\kappa$ B (Figure 8B).

377 Lastly, the ability of VP16 and E7 to associate with CBP was assessed after ectopic  
378 expression in HEK 293T cells. Neither VP16 nor E7, like VACV protein C6 used as negative  
379 control, co-precipitated CBP under conditions in which F14 did (Figure 8C). These findings  
380 indicate that the mimicry of p65 TAD by F14 is a strategy unique among human pathogenic  
381 viruses to suppress the activation of NF- $\kappa$ B.

382

## 383 DISCUSSION

384 The inducible transcription of NF- $\kappa$ B-dependent genes is a critical response to virus infection.  
385 After binding to  $\kappa$ B sites in the genome, NF- $\kappa$ B promotes the recruitment of chromatin  
386 remodelling factors, histone-modifying enzymes, and components of the transcription  
387 machinery. Thereby, NF- $\kappa$ B couples the sensing of viral and inflammatory signals to the  
388 selective activation of the target genes. In response, viruses have evolved multiple immune  
389 evasion strategies, including interference with NF- $\kappa$ B activation. VACV is a paradigm in viral  
390 evasion mechanisms, inasmuch as this poxvirus encodes 15 proteins known to intercept NF-  
391  $\kappa$ B activation downstream of PRRs and cytokine receptors [reviewed by [55, 56], [91, 92]].  
392 Nonetheless, a VACV strain lacking all these inhibitors still prevented NF- $\kappa$ B activation after  
393 p65 translocation into the nucleus [57], indicating the existence of other inhibitor(s).

394 Here, VACV protein F14, which is conserved in all orthopoxviruses, including ancient variola  
395 viruses, is shown to inhibit NF- $\kappa$ B activation within the nucleus and its mechanism of action is  
396 elucidated. First, ectopic expression of F14 reduces NF- $\kappa$ B-dependent gene expression  
397 stimulated by TNF- $\alpha$  or IL-1 $\beta$  (Figure 1A, B). Second, F14 is expressed early during VACV  
398 infection, and is small enough (8 kDa) to diffuse passively into the nucleus (Figure 1E, H).  
399 Third, a VACV strain lacking both A49 and F14 (vv811 $\Delta$ A49 $\Delta$ F14) is less able to suppress  
400 cytokine-stimulated NF- $\kappa$ B-dependent gene expression than vv811 $\Delta$ A49 (Figure 1I). Fourth,  
401 following TNF- $\alpha$  stimulation, I $\kappa$ B $\alpha$  degradation, IKK-mediated phosphorylation of p65 at S536  
402 and p65 accumulation in the nucleus remained unaffected in the presence of F14 (Figure 2A,  
403 B). Lastly, F14 blocked NF- $\kappa$ B-dependent gene expression stimulated by p65 overexpression,  
404 indicating that it acts at or downstream of p65 (Figure 2C). Mechanistically, F14 inhibits NF-  
405  $\kappa$ B via a C-terminal 23 aa motif that resembles the acidic activation domain of p65. F14  
406 disrupts the binding of p65 to its coactivator CBP (Figures 4 and 5) and reduces acetylation of  
407 p65 K310. Subsequently, F14 inhibits the inducible recruitment of BRD4 to *CCL2* and *CXCL10*  
408 promoters, but not to *NFKBIA* and *CXCL8* promoters (Figure 7). These findings correlated  
409 with F14 suppressing *CCL2* and *CXCL10*, but not *NFKBIA* and *CXCL8*, mRNA expression  
410 (Figure 6A, B, D, E). The selective inhibition of a subset of NF- $\kappa$ B-dependent genes by F14,  
411 despite the interference with molecular events deemed important for p65-mediated  
412 transactivation, underscores the complexity of the nuclear actions of NF- $\kappa$ B. Initial  
413 understanding of NF- $\kappa$ B-mediated gene activation was derived mostly using artificial reporter  
414 plasmids, but subsequent genome-wide, high-throughput studies uncovered diverse  
415 mechanisms of gene activation [14, 16, 24, 28, 29, 86, 93]. Because multiple promoters  
416 containing  $\kappa$ B sites are preloaded with CBP/p300, RNAP II and general transcription factors,  
417 the activation of transcription by NF- $\kappa$ B relies on the recruitment of BRD4 [86, 93].

418 Recruitment of BRD4 to promoters and enhancers occurs via bromodomain-mediated docking  
419 onto acetyl-lysine residues on either histones or non-histone proteins and promotes chromatin  
420 remodelling and transcription [reviewed by [83, 84]]. For NF- $\kappa$ B-bound promoters, BRD4  
421 recognises p65 acetylated at K310 [39]. This explains how F14 reduced inducible enrichment  
422 of BRD4 on the *CCL2* and *CXCL10* promoters following TNF- $\alpha$  stimulation: namely, reduced  
423 acetylation of p65 by CBP (Figure 7A, B, E, F). Nonetheless, BRD4 enrichment on the *NFKBIA*  
424 and *CXCL8* promoters remained unaffected in the presence of F14 (Figure 7C, D). Genes  
425 whose expression is resistant to F14 inhibition might be activated independently of the p65  
426 TA<sub>1</sub> domain, as is the case for some NF- $\kappa$ B-responsive genes in mouse fibroblasts stimulated  
427 with TNF- $\alpha$ , including *Nfkb1a*. For those genes, p65 occupancy on the promoter elements  
428 suffices for gene activation, via recruitment of secondary transcription factors [24]. However,  
429 BRD4 enrichment on *NFKBIA* and *CXCL8* promoters also remained unaffected in the  
430 presence of the bromodomain inhibitor JQ1 (Figure 7H, I), indicating alternative mechanism(s)  
431 of BRD4 recruitment to some promoters. Downstream of p65, alternative recruitment via

432 protein-protein interactions through the C-terminal domains of BRD4 might mediate BRD4  
433 recruitment to some NF- $\kappa$ B-bound promoters independently of the recognition of acetyl-lysine  
434 residues by the N-terminal bromodomains, which is recognised as the main mechanism of  
435 BRD4 recruitment to chromatin [reviewed by [83, 84]]. For instance, BRD4 interacts directly  
436 with multiple transcription factors and chromatin remodellers independently of acetylation [94].  
437 Further investigation of acetylation-independent recruitment of BRD4 to inducible promoters  
438 observed here and elsewhere [95] is warranted.

439 In the nucleus, p65 engages with multiple binding partners via its transactivation domains,  
440 including the direct interactions between TA<sub>1</sub> and TA<sub>2</sub> and the KIX and transcriptional adaptor  
441 zinc finger (TAZ) 1 domains of CBP, respectively. These interactions are mediated by  
442 hydrophobic contacts of the  $\Phi$ XX $\Phi$  motifs and complemented by electrostatic contacts by  
443 the acidic residues in the vicinity of the hydrophobic motifs [79, 93]. Sequence analysis  
444 suggested that F14 mimics the p65 TA<sub>1</sub> domain (Figure 3A). Indeed, fusion of the TAD-like  
445 domain of F14 to a p65 mutant lacking the TA<sub>1</sub> domain restored its transactivation activity to  
446 wildtype levels (Figure 3E). This explains the observation from a yeast two-hybrid screen of  
447 VACV protein-protein interactions, in which F14 could not be tested because it was found to  
448 be a strong activator when fused to the GAL4 DNA-binding domain [96]. Site-directed  
449 mutagenesis of F14 revealed that the dipeptide D62/63, but not L65 or L68 of the  $\Phi$ XX $\Phi$   
450 motif, is required for inhibition of NF- $\kappa$ B (Figure 4A), for interaction with CBP (Figure 4B) and  
451 for the efficient disruption of p65 binding to CBP (Figure 5D). This contrasts with the molecular  
452 determinants of p65 TA<sub>1</sub> function, i.e., both hydrophobic (F542) and acidic (including D539  
453 and D541) residues contribute to p65 TA<sub>1</sub> transactivation activity [80, 81]. Although the p65  
454 TA<sub>1</sub> binding to the KIX domain of CBP was shown to depend on F542, the importance of the  
455 electrostatic interactions by D539 and D541 is yet to be tested [79]. Of note, a recent high-  
456 throughput mutagenesis analysis of a model acidic activation domain provided useful insight  
457 into the relative contributions of hydrophobic and acidic residues for transcriptional activity.  
458 This analysis supports a model in which key hydrophobic residues require the acidic residues  
459 to keep them exposed to solvent where they can interact with coactivators [97]. We cannot  
460 rule out that F14 function depends on other C-terminal hydrophobic residues, but our  
461 observation that F14-D62/63K (F14-D62 aligns with p65-D539) mutant is impaired in  
462 disrupting p65-KIX interaction in cells is in line with the hypothesis of how acidic activation  
463 domains work. Future elucidation of the structure of F14-KIX complex and its comparison with  
464 p65 TA<sub>1</sub>-KIX co-structure will be necessary to address this apparent discrepancy. The  
465 “imperfect” nature of F14 mimicry is not without precedent in poxviruses. VACV protein A49,  
466 the mimic of I $\kappa$ B $\alpha$  phosphodegron, contains an extra aa residue between the two  
467 phosphorylatable serine residues of the degron and requires the phosphorylation of just one  
468 of the two serines to interact with the E3 ligase  $\beta$ -TrCP and thus to prevent I $\kappa$ B $\alpha$  degradation  
469 [54].

470 The diminished acetylation of p65 K310 is a direct consequence of the disruption of CBP and  
471 p65 interaction by F14. Other poxvirus proteins are reported to inhibit p65 acetylation. For  
472 instance, ectopic expression of VACV protein K1 inhibited CBP-dependent p65 acetylation  
473 and NF- $\kappa$ B-dependent gene expression [98], whilst during infection, K1 inhibited NF- $\kappa$ B  
474 activation upstream of I $\kappa$ B $\alpha$  degradation [99]. Regardless of whether K1 inhibits NF- $\kappa$ B  
475 upstream or downstream of p65, the vv811 $\Delta$ A49 strain used to predict the existence of  
476 additional VACV inhibitors of NF- $\kappa$ B lacks K1 [57]. The other poxviral protein that inhibits CBP-  
477 mediated acetylation of p65, and thereby NF- $\kappa$ B activation, is encoded by gene 002 of orf  
478 virus, a parapoxvirus that causes mucocutaneous infections in goats and sheep [100].  
479 However, protein 002 differs from F14 in that it interacts with p65 to prevent phosphorylation  
480 at p65-S276 and the subsequent acetylation at K310 by p300 [100, 101].

481 This study adds VACV protein F14 to the list of viral binding partners of CBP and its paralogue  
482 p300, which includes adenovirus E1A protein [102], human immunodeficiency virus (HIV) 1  
483 Tat protein [103], human T-cell lymphotropic virus (HTLV) 1 Tax protein [104], high-risk HPV16  
484 E6 protein [105], and polyomavirus T antigen [106]. Despite the fact that some of these  
485 proteins also inhibit NF- $\kappa$ B activation [43, 105, 107], F14 is unique among them in mimicking  
486 p65 TA<sub>1</sub> to bind to CBP and prevent its interaction with p65. HPV16 E6 also disrupts the  
487 interaction of CBP with p65 but, unlike F14, E6 lacks a  $\Phi$ XX $\Phi$  $\Phi$  motif surrounded by acidic  
488 residues and inhibits the expression of CXCL8 and therefore is mechanistically distinct [43].  
489 After searching for additional viral proteins that might mimic p65 TAD, we focused on HPV16  
490 E7 and HSV-1 VP16. The latter protein has a prototypical acidic TAD (Figure 8A), the former  
491 bears a motif resembling the  $\Phi$ XX $\Phi$  $\Phi$  motif (Figure 8B), and both proteins inhibit NF- $\kappa$ B  
492 activation [43, 44, 88-90]. Data presented here confirm that VP16 and E7 each inhibit NF- $\kappa$ B-  
493 dependent gene expression (Figure 8A, B). However, neither co-precipitated CBP under  
494 conditions in which F14 did (Figure 8C), suggesting VP16 and E7 inhibit NF- $\kappa$ B activation by  
495 a mechanism distinct from F14. The interaction between VP16 and CBP is contentious [21,  
496 44] and data presented here suggest that these two proteins do not associate with each other  
497 under the conditions tested. Therefore, the molecular mimicry of F14 might be only rivalled by  
498 that of the avian reticuloendotheliosis virus, a retrovirus whose *v-Rel* gene was acquired from  
499 an avian host. A viral orthologue of c-Rel with weak transcriptional activity, v-Rel acts as  
500 dominant-negative protein to repress NF- $\kappa$ B-dependent gene activation in avian cells [108].

501 Overall, our search for additional inhibitors of NF- $\kappa$ B activation encoded by VACV unveiled a  
502 viral strategy to inhibit this transcription factor that is unique among known viral antagonists of  
503 NF- $\kappa$ B. By mimicking the TA<sub>1</sub> domain of p65, F14 disrupts the interaction between p65 and its  
504 coactivator CBP, thus inhibiting the downstream molecular events that trigger the activation of  
505 a subset of inflammatory genes in response to cytokine stimulation. Among these events, the  
506 recruitment of RNAP II processivity factor BRD4 is important for induction of the inflammatory  
507 response. This study also showed BRD4 is recruited to some inducible NF- $\kappa$ B-dependent  
508 promoters independently of the recognition of acetylated chromatin (i.e., acetyl-lysine  
509 residues), via an unknown mechanism that warrants further investigation. Two lines of  
510 evidence illustrated the biological importance of F14. First, F14-D62/63 site is conserved in  
511 F14 orthologues from different orthopoxviruses, including human pathogens cowpox and  
512 monkeypox viruses, and ancient (10<sup>th</sup> century CE) and modern variola virus strains (Figure  
513 3A). Second, a VACV strain lacking F14 is attenuated in an intradermal model of infection  
514 (Figure 1F), despite the presence of several other VACV-encoded NF- $\kappa$ B inhibitors [reviewed  
515 by [55, 56]]. The attenuation of  $\nu\Delta$ F14 also shows the function of F14 is not redundant with  
516 these other inhibitors of NF- $\kappa$ B, despite the selective inhibition imparted by F14 (Figure 6A-F).  
517 From the viral perspective, the selective inhibition of only a subset of NF- $\kappa$ B-responsive genes  
518 by F14 might represent an adaptation to counteract the host immune response more  
519 efficiently. If an NF- $\kappa$ B-activating signal reached the nucleus of an infected cell, maintaining  
520 expression of some NF- $\kappa$ B-dependent genes, particularly *NFKB1A*, might promote the signal  
521 termination by I $\kappa$ B $\alpha$ . Newly synthesised I $\kappa$ B $\alpha$  not only tethers cytoplasmic NF- $\kappa$ B, but can also  
522 remove NF- $\kappa$ B from the DNA and cause its export from the nucleus [17, 18, 109]. We anticipate  
523 that other viruses might also use the selective inhibition of NF- $\kappa$ B to exploit the pro-viral  
524 functions of active NF- $\kappa$ B whilst dampening its pro-inflammatory and antiviral activities.

525

526 ACKNOWLEDGEMENTS

527 The authors thank Rachel Seear, Stephanie Macilwee, and Jemma Milburn for technical  
528 support, and Florian Pfaff and Martin Beer (Friedrich-Loeffler-Institut, Germany) for help with  
529 access to cowpox RNA sequencing dataset. We also thank John Doorbar (Dept. Pathology,  
530 University of Cambridge, UK), Colin Crump (Dept. Pathology, University of Cambridge, UK),  
531 Tony Kouzarides (Dept. Pathology and The Gurdon Institute, University of Cambridge, UK),  
532 and Gerd Blobel (University of Pennsylvania, Philadelphia, USA) for providing us with  
533 reagents. We are also grateful to Tony Kouzarides for helpful advice and to Callum Talbot-  
534 Cooper for critical reading of the manuscript.

535

536 FUNDING

537 This work was supported by grant 090315 from the Wellcome Trust (to G.L.S.). B.Y.W.C.'s  
538 laboratory is funded by Medical Research Council (grant MR/R021821/1), Biotechnology and  
539 Biological Sciences Research Council (grant BB/V017780.1) and Isaac Newton Trust (grant  
540 G101522). J.D.A. was a postdoctoral fellow of the Science without Borders programme from  
541 CNPq-Brazil (grant 235246/2014-0).

542

543 DECLARATION OF INTERESTS

544 The authors declare no competing interests.

545

546 AUTHOR CONTRIBUTION

547 Conceptualisation: JDA, AAT, GLS

548 Methodology: JDA, HR, AAT, EVS, CAM, AJB, MPB, BYWC

549 Software: N/A

550 Validation: JDA, HR, AAT, EVS

551 Formal Analysis: JDA, HR

552 Investigation: JDA, HR, AAT, EVS

553 Resources: AAT, CAM, AJB, BYWC, GLS

554 Data Curation: JDA

555 Writing – Original Draft Preparation: JDA

556 Writing – Review and Editing: JDA, HR, AAT, CAM, AJB, BYWC, GLS

557 Visualisation: JDA

558 Supervision: JDA, GLS

559 Project Administration: JDA, GLS

560 Funding: JDA, GLS

561

## 562 MATERIAL AND METHODS

### 563 *Sequence analysis*

564 Candidate open reading frames (ORFs) encoding the unknown VACV inhibitor of NF- $\kappa$ B were  
565 first selected based on VACV genomes available on the NCBI database (accession numbers:  
566 NC\_006998.1 for the Western Reserve strain, and M35027.1 for the Copenhagen strain). The  
567 prediction of molecular mass and isoelectric point (pI), and of nuclear localisation signal (NLS)  
568 sequences, of the candidate VACV gene products was done with ExPASy Compute pI/MW  
569 tool ([https://web.expasy.org/compute\\_pi/](https://web.expasy.org/compute_pi/)) and SeqNLS (<http://mleg.cse.sc.edu/seqNLS/>),  
570 [110], respectively. Domain searches were performed using InterPro  
571 (<http://www.ebi.ac.uk/interpro/search/sequence/>), UniProt (<https://www.uniprot.org/uniprot/>),  
572 HHPred (<https://toolkit.tuebingen.mpg.de/tools/hhpred/>), PCOILS  
573 (<https://toolkit.tuebingen.mpg.de/tools/pcoils/>), and Phobius  
574 (<https://www.ebi.ac.uk/Tools/pfa/phobius/>) [111]. Gene family searches were done within the  
575 Pfam database (<https://pfam.xfam.org/>) and conservation within the poxvirus family, with Viral  
576 Orthologous Clusters (<https://4virology.net/virology-ca-tools/vocs/>) [74] and protein BLAST  
577 (<https://blast.ncbi.nlm.nih.gov/Blast.cgi>) searches. Phyre2  
578 (<http://www.sbg.bio.ic.ac.uk/phyre2/html/page.cgi?id=index>) [78] was used for the prediction  
579 of F14 protein structure. Multiple sequence alignments were performed using Clustal Omega  
580 (<https://www.ebi.ac.uk/Tools/msa/clustalo/>) and ESPript 3.0  
581 (<http://esprict.ibcp.fr/ESPript/ESPript/>) [112] was used for the visualisation of protein  
582 sequence alignments. All poxvirus sequences referred to in this study are listed in Table S1.

583

### 584 *Expression vectors*

585 The VACV *F6L*, *F7L*, *F14L*, *A47L*, *B6R*, *B11R*, and *B12R* ORFs (strains Western Reserve and  
586 Copenhagen, if sequences diverged between strains) were codon-optimised for expression in  
587 human cells and synthesised by GeneArt (Thermo Fisher Scientific), with an optimal 5' Kozak  
588 sequence and fused to an N-terminal FLAG epitope. For ease of subsequent subcloning, 5'  
589 *Bam*HI and 3' *Xba*I restriction sites were included as well as a *Not*I site + 1G between the  
590 epitope tag and the ORF. The *Not*I site + 1G generates an (Ala)<sub>3</sub> linker between the epitope  
591 tag and the protein of interest. For mammalian expression, nucleotide sequences encoding  
592 N-terminal FLAG-tagged VACV proteins were subcloned between the *Bam*HI and *Xba*I  
593 restriction sites of a pcDNA4/TO vector (Invitrogen). Alternatively, codon-optimised F14 was  
594 PCR-amplified to include a 3' HA tag or a 3' FLAG or no epitope tag, and 5' *Bam*HI and 3'  
595 *Xba*I sites to clone into pcDNA4/TO plasmid. In addition, codon-optimised F14 sequence was  
596 PCR-amplified to include 5' *Bam*HI and 3' *Not*I sites to facilitate cloning into a pcDNA4/TO-  
597 based vector containing a TAP tag sequence after the *Not*I site; the TAP tag consisted of two  
598 copies of the Strep-tag II epitope and one copy of the FLAG epitope [113]. Mutant F14  
599 expression vectors were constructed with QuikChange II XL Site-Directed Mutagenesis kit  
600 (Agilent), using primers containing the desired mutations and C-terminal TAP-tagged codon-  
601 optimised F14 cloned into pcDNA4/TO as template. The pcDNA4/TO-based expression  
602 vectors for VACV proteins C6 and B14 have been described [66, 114].

603 The ORF encoding HPV16 E7 protein was amplified from a template kindly provided by Dr.  
604 Christian Kranjec and Prof. John Doorbar (Dept. Pathology, Cambridge, UK) and cloned into  
605 5' *Bam*HI and 3' *Not*I sites of a pcDNA4/TO-based vectors fused to a C-terminal TAP tag or  
606 HA epitope. Vectors expressing mutant E7 proteins were generated by site-directed  
607 mutagenesis as described above. The ORF encoding HSV-1 VP16 and  $\Delta$ TAD mutant (lacking  
608 aa 413-490) were amplified from a pEGFP-C2-based VP16 expression plasmid kindly

609 provided by Dr. Colin Crump (Dept. Pathology, Cambridge, UK) and cloned into 5' *Bam*HI and  
610 3' *Not*I sites of a pcDNA4/TO-based vector fused to a C-terminal HA epitope.

611 The pcDNA4/TO plasmids encoding TAP- and HA-tagged p65 were described elsewhere [91],  
612 and plasmids expressing FLAG-tagged mouse CBP (pCMV5-CBP-FLAG), and HA-tagged  
613 mouse CBP (pRcRSV-CBP-HA) were kind gifts from Prof. Gerd A. Blobel (University of  
614 Pennsylvania, Philadelphia, USA) and Prof. Tony Kouzarides (Dept. Pathology and The  
615 Gurdon Institute, Cambridge, UK), respectively. Firefly luciferase reporter plasmids for NF- $\kappa$ B,  
616 STAT and AP-1, as well as the constitutively active TK-*Renilla* luciferase reporter plasmid  
617 were kind gifts from Prof. Andrew Bowie (Trinity College, Dublin, Republic of Ireland). The NF-  
618  $\kappa$ B, AP-1 and STAT reporter plasmids encode firefly luciferase under the control of consensus  
619 NF- $\kappa$ B response element repeats [(GGGAATTTCC)<sub>5</sub>], AP-1 response element repeats  
620 [(TGACTAA)<sub>7</sub>] and IFN-stimulated response element (ISRE) [(TAGTTTCACTTTCCC)<sub>5</sub>],  
621 respectively.

622 The oligonucleotide primers used for cloning and site-directed mutagenesis are listed in Table  
623 S2. Nucleotide sequences of the inserts in all the plasmids were verified by Sanger DNA  
624 sequencing.

625

#### 626 *Cell lines*

627 All cell lines were grown in medium supplemented with 10% foetal bovine serum (FBS, Pan  
628 Biotech), 100 units/mL of penicillin and 100  $\mu$ g/mL of streptomycin (Gibco), at 37°C in a humid  
629 atmosphere containing 5% CO<sub>2</sub>. Human embryo kidney (HEK) 293T epithelial cells (ATCC,  
630 CRL-11268), and monkey kidney BS-C-1 (ATCC, CCL-26) and CV-1 (ATCC, CCL-70)  
631 epithelial cells were grown in Dulbecco's modified Eagle's medium (DMEM, Gibco). Rabbit  
632 kidney RK13 epithelial cells (ATCC, CCL-37) were grown in minimum essential medium  
633 (MEM, Gibco) and human cervix HeLa epithelial cells (ATCC, CCL-2), in MEM supplemented  
634 with non-essential amino acids (Gibco). T-REx-293 cells (Invitrogen) were grown in DMEM  
635 supplemented with blasticidin (10  $\mu$ g/mL, InvivoGen), whilst the growth medium of T-REx-293-  
636 derived cell lines stably transfected with pcDNA4/TO-based plasmids was further  
637 supplemented with zeocin (100  $\mu$ g/mL, Gibco).

638 The absence of mycoplasma contamination in the cell cultures was tested routinely with  
639 MycoAlert detection kit (Lonza), following the manufacturer's recommendations.

640

#### 641 *Construction of recombinant viruses*

642 A VACV Western Reserve (WR) strain lacking F14 ( $\Delta$ F14) was constructed by introduction  
643 of a 137-bp internal deletion in the *F14L* ORF by transient dominant selection [115]. A DNA  
644 fragment including the first 3 bp of *F14L* ORF and 297 bp upstream, intervening *Not*I and  
645 *Hind*III sites, and the last 82 bp of the ORF and 218 bp downstream were generated by  
646 overlapping PCR and inserted into the *Pst*I and *Bam*HI sites of pUC13-EcoGpt-EGFP plasmid,  
647 containing the *Escherichia coli* guanylylphosphoribosyl transferase (EcoGpt) gene fused in-  
648 frame with the enhanced green fluorescent protein (EGFP) gene under the control of the  
649 VACV 7.5K promoter [70]. The resulting plasmid contained an internal deletion of the *F14L*  
650 ORF (nucleotide positions 42049-42185 from VACV WR reference genome, accession  
651 number NC\_006998.1). The remaining sequence of *F14L* was out-of-frame and contained  
652 multiple stop codons, precluding the expression of a truncated version of F14. The derived  
653 plasmid was transfected into CV-1 cells that had been infected with VACV-WR at 0.1 p.f.u./cell



654 for 1 h. After 48 h, progeny viruses that incorporated the plasmid by recombination and  
655 expressed the Ecogpt-EGFP were selected and plaque-purified three times on monolayers of  
656 BS-C-1 cells in the presence of mycophenolic acid (25 µg/mL), supplemented with  
657 hypoxanthine (15 µg/mL) and xanthine (250 µg/mL). The intermediate recombinant virus was  
658 submitted to three additional rounds of plaque purification in the absence of the selecting drugs  
659 and GFP-negative plaques were selected. Under these conditions, progeny viruses can  
660 undergo a second recombination that result in loss of the Ecogpt-EGFP cassette  
661 concomitantly with either incorporation of the desired mutation (vΔF14) or reversal to wildtype  
662 genotype (vF14). Because vΔF14 and vF14 are sibling strains derived from the same  
663 intermediate virus, they are genetically identical except for the 137-bp deletion in the *F14L*  
664 locus. Viruses were analysed by PCR to identify recombinants by distinguishing wildtype and  
665 ΔF14 alleles, and the presence or absence of the Ecogpt-EGFP cassette.

666 To restore F14 expression in vΔF14, the *F14L* locus was amplified by PCR, including about  
667 250 bp upstream and downstream of the ORF, and inserted into the *Pst*I and *Bam*HI sites of  
668 pUC13-Ecogpt-EGFP plasmid. Additionally, *F14L* ORF fused to the sequence coding a C-  
669 terminal TAP tag was also amplified by overlapping PCR, including the same flanking  
670 sequences described above, and inserted into the *Pst*I and *Bam*HI sites of pUC13-Ecogpt-  
671 EGFP plasmid. By using the same transient dominant selection method, these plasmids were  
672 used to generate two revertant strains derived from vΔF14: (i) vF14-Rev, in which F14  
673 expression from its natural locus was restored, and (ii) vF14-TAP, expressing F14 fused to a  
674 C-terminal TAP tag under the control of its natural promoter. The vC6-TAP virus was described  
675 elsewhere [114].

676 A VACV vv811 strain lacking both A49 and F14 (vv811ΔA49ΔF14) was also constructed by  
677 transient dominant selection. The resultant virus contained the same 137-bp internal deletion  
678 in the *F14L* ORF within the vv811ΔA49 strain generated previously [57]. The distinction  
679 between wildtype and ΔF14 alleles in the obtained viruses, and the presence or absence of  
680 the Ecogpt-EGFP cassette, was determined by PCR analysis.

681 The oligonucleotide primers used to generate the recombinant VACV strains are listed in Table  
682 S2. To verify that all the final recombinant viruses harboured the correct sequences, PCR  
683 fragments spanning the *F14L* locus were sequenced.

684

#### 685 *Preparation of virus stocks*

686 The stocks of virus strains derived from VACV WR were prepared in RK13 cells. Cells grown  
687 to confluence in T-175 flasks were infected at 0.01 p.f.u./cell until complete cytopathic effect  
688 was visible. The cells were harvested by centrifugation, suspended in a small volume of  
689 DMEM supplemented with 2% FBS, and submitted to multiple cycles of freezing/thawing and  
690 sonication to lyse the cells and disrupt aggregates of virus particles and cellular debris. These  
691 crude virus stocks were used for experiments in cultured cells. Crude stocks of vv811 and  
692 derived strains were prepared in the same way, except for the BS-C-1 cells used for infection.  
693 For the *in vivo* work, virus stocks were prepared by ultracentrifugation of the cytoplasmic  
694 fraction of infected cell lysates through sucrose cushion and suspension of the virus samples  
695 in 10 mM Tris-HCl pH 9.0 [116]. The viral titres in the stocks were determined by plaque assay  
696 on BS-C-1 cells.

697

#### 698 *Virus growth and spread assays*

699 To analyse virus growth properties in cell culture, single-step growth curve experiments were  
700 performed in HeLa cells. Cells were grown to about 90% confluence in T-25 flasks and then  
701 infected at 5 p.f.u./cell in growth medium supplemented with 2% FBS. Virus adsorption was at  
702 37°C for 1 h. Then the inoculum was removed, and the cells were replenished with growth  
703 medium supplemented with 2% FBS. At 1, 8, and 24 h p.i., infected-cell supernatants and  
704 monolayers were collected for determination of extracellular and cell-associated infectious  
705 virus titres, respectively, by plaque assay on BS-C-1 cells. Supernatants were clarified by  
706 centrifugation to remove cellular debris and detached cells, whereas cell monolayers were  
707 scraped and disrupted by three cycles of freezing/thawing followed by sonication, to release  
708 intracellular virus particles.

709 The virus spread in cell culture was assessed by plaque formation. Confluent monolayers of  
710 BS-C-1 cells in 6-well plates were infected with 50 p.f.u./well and overlaid with MEM  
711 supplemented with 2% FBS and 1.5% carboxymethylcellulose. After 48 h, infected-cell  
712 monolayers were stained with 0.5% crystal violet solution in 20% methanol and imaged.

713

#### 714 *Construction of inducible F14-expressing T-REx-293 cell line*

715 T-REx-293 cells (Invitrogen), which constitutively expresses the Tet repressor (TetR) under  
716 the control of the human cytomegalovirus (HCMV) immediate early promoter, were transfected  
717 with pcDNA4/TO-coF14-TAP plasmid, which encodes human codon-optimised F14 fused to  
718 a C-terminal TAP tag under the control of the HCMV immediate early promoter and two  
719 tetracycline operator 2 (TetO<sub>2</sub>) sites. Transfected cells were selected in the presence of  
720 blasticidin (10 µg/mL) and zeocin (100 µg/mL) and clonal cell lines were obtained by limiting  
721 dilution. Expression of protein F14 within these clones was analysed by immunoblotting and  
722 flow cytometry with anti-FLAG antibodies. T-REx-293-EV, T-REx-293-B14, and T-REx-293-  
723 C6 cell lines were described elsewhere [63].

724

#### 725 *Reporter gene assays*

726 HEK 293T cells in 96-well plates were transfected in quadruplicate with firefly luciferase  
727 reporter plasmid (NF-κB, ISRE, or AP-1), TK-*Renilla* luciferase reporter plasmid (as an internal  
728 control) and the desired expression vectors or empty vector (EV) using *TransIT-LT1*  
729 transfection reagent (Mirus Bio), according to the manufacturer's instruction. On the following  
730 day, cells were stimulated with TNF-α (10 ng/ml, PeproTech) or IL-1β (20 ng/ml, PeproTech)  
731 for 8 h (for NF-κB activation), IFN-α2 (1000 U/ml, PeproTech) for 8 h (for IFNAR1/STAT  
732 activation), or phorbol 12-myristate 13-acetate (10 ng/ml) for 24 h (for MAPK/AP-1 activation).  
733 Alternatively, NF-κB was activated by co-transfection of p65-overexpressing plasmid and cells  
734 were harvested 24 h after transfection. To test the effect of increasing amounts of viral  
735 proteins, five-fold dilutions of the desired expression vectors were used (5 and 25 ng, or 5, 25,  
736 and 125 ng, depending on the experiment). The total amount of transfected DNA was made  
737 equivalent by addition of empty vector.

738 To measure NF-κB-luciferase activation during infection, A549 cells transduced with a  
739 lentiviral vector expressing the firefly luciferase under the control of an NF-κB promoter (A549-  
740 NF-κB-Luc) [57] were grown in 96-well plates and infected with VACV vv811 and derived  
741 strains at 5 p.f.u./cell. After 6 h, cells were stimulated with TNF-α (10 ng/ml, PeproTech) or IL-  
742 1β (20 ng/ml, PeproTech) for an additional 6 h. In parallel, A549-NF-κB-Luc cells grown in 6-  
743 well plates were infected with the equivalent amount of virus for 12 h and cell lysates were  
744 analysed by immunoblotting.

745 Cells were lysed using passive lysis buffer (Promega) and firefly and *Renilla* luciferase  
746 luminescence was measured using a FLUOstar luminometer (BMG). During the  
747 measurement, the gain was adjusted to keep the reads within the dynamic range of the  
748 luminometer. Home-made substrates for firefly luciferase (20 mM tricine, 2.67 mM  
749 MgSO<sub>4</sub>·7H<sub>2</sub>O, 0.1 mM EDTA, 33.3 mM DTT, 0.53 mM ATP, 0.27 mM acetyl coenzyme A, 0.5  
750 mM D-luciferin (Nanolight Technology), 0.3 mM magnesium carbonate hydroxide, pH 7.8] and  
751 *Renilla* luciferase [2 µg/ml native coelenterazine (Nanolight Technology) in PBS] were used.  
752 Promoter activity was obtained by calculation of firefly/*Renilla* luciferase ratios and the  
753 promoter activity under pathway stimulation was normalised to the activity of the respective  
754 non-stimulated control of each protein under test. In parallel, aliquots of the replicas of each  
755 condition tested were combined, mixed with 5 × SDS-gel loading buffer, and immunoblotted  
756 to confirm the expression of the proteins tested.

757

### 758 *Virus infection in cell culture*

759 HeLa or HEK 293T cells in 6-well plates (for protein expression analyses) or 10-cm dishes (for  
760 immunoprecipitation experiments) were infected at 5 p.f.u./cell. Viral inocula were prepared in  
761 growth medium supplemented with 2% FBS. Viral adsorption was done at 37°C for 1 h, after  
762 which the medium supplemented with 2% FBS was topped up to the appropriate vessel  
763 volume and cells were incubated at 37°C.

764

### 765 *In vivo experiments*

766 All animal experiments were conducted according to the Animals (Scientific Procedures) Act  
767 1986 under the license PPL 70/8524. Mice were purchased from Envigo and housed in  
768 specific pathogen-free conditions in the Cambridge University Biomedical Services facility.

769 For the intradermal (i.d.) model of infection, female C57BL/6 mice (6-8-week old) were  
770 inoculated with 10<sup>4</sup> p.f.u. in both ear pinnae and the diameter of the lesion was measured daily  
771 using a calliper [117]. For the intranasal (i.n.) model, female BALB/c mice (6-8-week old) were  
772 inoculated 5 × 10<sup>3</sup> p.f.u. divided equally into each nostril and were weighed daily [118]. In both  
773 cases, viral inocula were prepared in phosphate-buffered saline (PBS) supplemented with  
774 0.01% bovine serum albumin (BSA, Sigma-Aldrich) and the infectious titres in the  
775 administered inocula were confirmed by plaque assay.

776 For quantification of virus replication after the i.d. infection, infected mice were culled 3, 7, and  
777 10 d p.i. and ear tissues were collected, ground in a tissue homogeniser and passed through  
778 a 70-µm nylon mesh using DMEM containing 10% FBS. Samples were frozen, thawed and  
779 sonicated three times, to liberate cell-associated virus particles, and the infectious titres  
780 present were determined by plaque assay on BS-C-1 cells.

781

### 782 *Immunoblotting*

783 For analysis of protein expression, cells were washed with PBS and lysed on ice with cell lysis  
784 buffer [50 mM Tris-HCl pH 8.0, 150 mM NaCl, 1 mM EDTA, 10% (v/v) glycerol, 1% (v/v) Triton  
785 X-100 and 0.05% (v/v) Nonidet P-40 (NP-40)], supplemented with protease (cOmplete Mini,  
786 Roche) and phosphatase (PhosSTOP, Roche) inhibitors, for 20 min. Lysed cells were scraped  
787 and lysates were clarified to remove insoluble material by centrifugation at 17,000 × g for 15  
788 min at 4°C. Protein concentration in the cell lysate was determined using a bicinchoninic acid

789 protein assay kit (Pierce). After mixing with 5 × SDS-gel loading buffer and boiling at 100°C  
790 for 5 min, equivalent amounts of protein samples (15-50 µg/well) were loaded onto SDS-  
791 polyacrylamide gels or NuPAGE 4 to 12% Bis-Tris precast gels (Invitrogen), separated by  
792 electrophoresis and transferred onto nitrocellulose membranes (GE Healthcare). Membranes  
793 were blocked at room temperature with either 5% (w/v) non-fat milk or 3% (w/v) BSA (Sigma-  
794 Aldrich) in Tris-buffered saline (TBS) containing 0.1% (v/v) Tween-20. To detect the  
795 expression of the protein under test, the membranes were incubated with specific primary  
796 antibodies diluted in blocking buffer at 4°C overnight. After washing with TBS containing 0.1%  
797 (v/v) Tween-20, membranes were probed with fluorophore-conjugated secondary antibodies  
798 (LI-COR Biosciences) diluted in 5% (w/v) non-fat milk at room temperature for 1 h. After  
799 washing, membranes were imaged using the Odyssey CLx imaging system (LI-COR  
800 Biosciences), according to the manufacturer's instructions. For quantitative analysis of protein  
801 levels, the band intensities on the immunoblots were quantified using the Image Studio  
802 software (LI-COR Biosciences). The antibodies used for immunoblotting are listed in Table  
803 S3.

804

#### 805 *Co-immunoprecipitation and pull-down assays*

806 HEK 293T or HeLa cells in 10-cm dishes were infected at 5 p.f.u./cell for 8 h or transfected  
807 overnight with the specified epitope-tagged plasmids using polyethylenimine (PEI,  
808 Polysciences, 2 µl of 1 mg/ml stock per µg of plasmid DNA). For the competition assays, cells  
809 were starved of FBS for 3 h and stimulated with TNF-α (40 ng/ml, PeproTech) in FBS-free  
810 DMEM for 15 min before harvesting. Cells were washed with ice-cold PSB, scraped in  
811 immunoprecipitation (IP) buffer [50 mM Tris-HCl pH 7.4, 150 mM NaCl, 0.5% (v/v) NP-40, 0.1  
812 mM EDTA], supplemented with protease (cOmplete Mini, Roche) and phosphatase  
813 (PhosSTOP, Roche) inhibitors, on ice, transferred to 1.5-ml microcentrifuge tubes and rotated  
814 for 30 min at 4°C. Cell lysates were centrifuged at 17,000 × g for 15 min at 4°C and the soluble  
815 fractions were incubated with 20 µl of one of the following affinity resins equilibrated in IP  
816 buffer: (i) anti-FLAG M2 agarose (Sigma-Aldrich, Cat# A2220) for IP of FLAG- or TAP-tagged  
817 proteins; (ii) anti-HA agarose (Sigma-Aldrich, Cat# A2095) for IP of HA-tagged proteins; or (iii)  
818 Strep-Tactin Superflow agarose (IBA, Cat# 2-1206-025) for pull-down of TAP-tagged protein  
819 via Strep-tag II epitope. After 2 h of rotation at 4°C, the protein-bound resins were washed  
820 three times with ice-cold IP buffer. The bound proteins were eluted by incubation with 2× SDS-  
821 gel loading buffer and boiled at 100°C for 5 min before analysis by SDS-polyacrylamide gel  
822 electrophoresis and immunoblotting, along with 10% input samples collected after clarification  
823 of cell lysates. The antibodies used for immunoprecipitation are listed in Table S3.

824

#### 825 *Reverse transcription and quantitative PCR*

826 To analyse mRNA expression of NF-κB-responsive genes, T-REx-293-F14 in 12-well plates  
827 were left uninduced or induced overnight with 100 ng/ml doxycycline (Melford, UK) to induce  
828 the expression of F14. Alternatively, T-REx-293-F14 and C6 in 12-well plates were induced  
829 overnight with 100 ng/ml doxycycline (Melford, UK) to induce the expression of the VACV  
830 proteins. The next day, cells were starved for 3 h by removal of serum from the medium and  
831 then stimulated in duplicate with TNF-α (40 ng/ml, PeproTech) in FBS-free DMEM for 0, 1 or  
832 6 h. RNA was extracted using RNeasy Mini Kit (Qiagen) and complementary DNA (cDNA)  
833 was synthesised using SuperScript III reverse transcriptase (Invitrogen) and oligo-dT primers  
834 (Thermo Scientific), according to the instructions of the respective manufacturers. The mRNA  
835 levels of *CCL2*, *CXCL8*, *CXCL10*, *GAPDH* and *NFKBIA* were quantified by quantitative PCR

836 using gene-specific primer sets, fast SYBR green master mix (Applied Biosystems) and the  
837 ViiA 7 real-time PCR system (Life Technologies). The oligonucleotide primers used for the  
838 qPCR analysis of gene expression are listed in Table S2. Fold-induction of the NF- $\kappa$ B-  
839 responsive genes was calculated by the  $2^{-\Delta\Delta Ct}$  method using non-induced and non-stimulated  
840 T-REx-293-F14 cells, or induced and non-stimulated T-REx-293-C6 cells, as the reference  
841 sample, and *GAPDH* as the housekeeping control gene.

842

#### 843 *Enzyme-linked immunosorbent assay (ELISA)*

844 The secretion of CXCL8 and CXCL10 was measured by ELISA. T-REx-293-EV, T-REx-293-  
845 B14, T-REx-293-C6 and T-REx-293-F14 cells in 12-well plates were incubated overnight in  
846 the presence or absence of 100 ng/ml doxycycline (Melford, UK) to induce VACV protein  
847 expression. The next day, cells were stimulated in triplicate with TNF- $\alpha$  (40 ng/ml, PeproTech)  
848 in DMEM supplemented with 2% FBS for 16 h. To test the effect of the pharmacological  
849 inhibition of BRD4 bromodomains, cells were treated with (+)-JQ1 (5  $\mu$ M, Abcam, Cat#  
850 ab141498, dissolved in DMSO) or the equivalent amount of DMSO [0.025% (v/v)] 30 min  
851 before TNF- $\alpha$  stimulation. The supernatants were assayed for human CXCL8 and CXCL10  
852 using the respective DuoSet ELISA kits (R&D Biosystems), according to the manufacturer's  
853 instructions.

854

#### 855 *Immunofluorescence*

856 For immunofluorescence microscopy, T-REx-293-EV, T-REx-293-B14, T-REx-293-C6 and T-  
857 REx-293-F14 cells were grown on poly-D-lysine-treated glass coverslips placed inside 6-well  
858 plates. Following induction of protein expression with 100 ng/ml doxycycline (Melford, UK)  
859 overnight, cells were starved of FBS for 3 h and then stimulated with 40 ng/ml TNF- $\alpha$   
860 (PeproTech) in FBS-free DMEM for 15 min. At the moment of harvesting, the cells were  
861 washed twice with ice-cold PBS and fixed in 4% (v/v) paraformaldehyde for 10 min. After  
862 quenching of free formaldehyde with 150 mM ammonium chloride for 5 min, the fixed cells  
863 were permeabilised with 0.1% (v/v) Triton X-100 in PBS for 5 min and blocked with 10% (v/v)  
864 FBS in PBS for 30 min. Staining was carried out with primary antibodies for 1 h, followed by  
865 incubation with the appropriate AlexaFluor fluorophore-conjugated secondary antibodies  
866 (Invitrogen Molecular Probes) for 30 min and mounting onto glass slides with Mowiol 4-88  
867 (Calbiochem) containing 0.5  $\mu$ g/ml DAPI (4',6-diamidino-2-phenylindole, Biotium). Images  
868 were acquired on an LSM 700 confocal microscope (Zeiss) using ZEN system software  
869 (Zeiss). Quantification of nuclear localisation of p65 was done manually on the ZEN lite  
870 software (blue edition, Zeiss). The details about the antibodies used for immunofluorescence  
871 are listed in Table S3.

872

#### 873 *Flow cytometry*

874 T-REx-293-F14 cells were induced overnight with 100 ng/ml doxycycline (Melford, UK) in the  
875 presence or absence of 10  $\mu$ M MG132 (Abcam). Cells were detached with trypsin-EDTA  
876 (Gibco), washed in PBS and fixed with 4% paraformaldehyde in PBS for 10 min at room  
877 temperature with intermittent agitation by vortexing. After centrifugation, fixed cells were  
878 suspended in PBS containing 0.1% BSA (Sigma-Aldrich). For intracellular staining of F14-  
879 TAP, cells were permeabilised with 0.1% saponin (Sigma-Aldrich) in PBS and stained with the  
880 mouse monoclonal antibody against the FLAG tag or isotype control, followed by PE goat anti-

881 mouse IgG (Poly4053, BioLegend). Immunostained cells were fixed again with 1%  
882 paraformaldehyde in PBS. Data were acquired with a FACScan/Cytek DXP8-upgraded flow  
883 cytometry analyser and analysed with FlowJo software.

884

#### 885 *Chromatin immunoprecipitation and quantitative PCR (ChIP-qPCR)*

886 T-REx-F14 cells in 15-cm dishes were incubated overnight in the absence or in the presence  
887 of 100 ng/ml doxycycline (Melford, UK) to induce F14 expression. The next day, cells were  
888 starved of FBS for 3 h and stimulated with TNF- $\alpha$  (40 ng/ml, PeproTech) in FBS-free DMEM  
889 for 0, 1 or 5 h. To test the effect of the pharmacological inhibition of BRD4 bromodomains, T-  
890 REx-293-EV cells were treated with (+)-JQ1 (5  $\mu$ M, Abcam, Cat# ab141498, dissolved in  
891 DMSO) or the equivalent amount of DMSO [0.025% (v/v)] 30 min before TNF- $\alpha$  stimulation.  
892 Cells were crosslinked with 1% (v/v) formaldehyde added directly to the growth medium. After  
893 10 min at room temperature, crosslinking was stopped by the addition of 0.125 M glycine. Cells  
894 were then lysed in 0.2% NP-40, 10 mM Tris-HCl pH 8.0, 10 mM NaCl, supplemented with  
895 protease (cComplete Mini, Roche), phosphatase (PhosSTOP, Roche) and histone deacetylase  
896 (10 mM sodium butyrate, Sigma-Aldrich) inhibitors, and nuclei were recovered by  
897 centrifugation at 600  $\times$  g for 5 min at 4°C. To prepare the chromatin, nuclei were lysed in 1%  
898 (w/v) SDS, 50 mM Tris-HCl pH 8.0, 10 mM EDTA, plus protease/phosphatase/histone  
899 deacetylase inhibitors, and lysates were sonicated in a Bioruptor Pico (Diagenode) to achieve  
900 DNA fragments of about 500 bp. After sonication, samples were centrifuged at 3,500  $\times$  g for  
901 10 min at 4°C and supernatants were diluted four-fold in IP dilution buffer [20 mM Tris-HCl pH  
902 8.0, 150 mM NaCl, 2 mM EDTA, 1% (v/v) Triton X-100, 0.01% (w/v) SDS] supplemented with  
903 protease/phosphatase/histone deacetylase inhibitors.

904 Protein G-conjugated agarose beads (GE Healthcare, Cat# 17-0618-02) equilibrated in IP  
905 dilution buffer were used to preclear the chromatin for 1 h at 4°C with rotation. Before the  
906 immunoprecipitation, 20% of the precleared chromatin was kept as input control.  
907 Immunoprecipitation was performed with 8  $\mu$ g of anti-BRD4 antibody (Cell Signalling  
908 Technology, #13440) or anti-GFP (Abcam, #ab290), used as negative IgG control, overnight  
909 at 4°C with rotation. Protein-DNA immunocomplexes were retrieved by incubation with 60  $\mu$ l  
910 of equilibrated protein G-conjugated agarose beads (GE Healthcare), for 2 h at 4°C, followed  
911 by centrifugation at 5,000  $\times$  g for 2 min at 4°C. Immunocomplex-bound beads were then  
912 washed: (i) twice with IP wash I [20 mM Tris-HCl pH 8.0, 50 mM NaCl, 2 mM EDTA, 1% (v/v)  
913 Triton X-100, 0.1% (w/v) SDS]; (ii) once with IP wash buffer II [10 mM Tris-HCl pH 8.0, 250  
914 mM LiCl, 1 mM EDTA, 1% (v/v) NP-40, 1% (w/v) sodium deoxycholate]; and (iii) twice with TE  
915 buffer (10 mM Tris-HCl pH 8.0, 1 mM EDTA). Antibody-bound chromatin was eluted with 1%  
916 SDS, 100 mM sodium bicarbonate for 15 min at room temperature. Formaldehyde crosslinks  
917 were reversed by incubation overnight at 67°C in presence of 1  $\mu$ g of RNase A and 300 mM  
918 NaCl, followed by proteinase K digestion for 2 h at 45°C. Co-immunoprecipitated DNA  
919 fragments were purified using the QIAquick PCR purification kit (Qiagen) and analysed by  
920 quantitative PCR targeting the promoter elements of *NFKBIA*, *CXCL8*, *CCL2*, and *CXCL10*  
921 genes. The oligonucleotide primers used for the qPCR analysis of ChIP are listed in Table S2.  
922 The primers target regions containing consensus  $\kappa$ B sites (5'-GGGRNYYYCC-3', in which R  
923 is a purine, Y is a pyrimidine, and N is any nucleotide), prioritising amplicons overlapping areas  
924 with histone modification often observed near active regulatory elements (H3K27ac) according  
925 to ENCODE Histone Modification database on UCSC Genome Browser  
926 (<https://genome.ucsc.edu/index.html>). Some primers have been described previously [15,  
927 119, 120].

928 The ChIP-qPCR data were analysed by the fold enrichment method. Briefly, the signals  
929 obtained from the ChIP with each antibody were first normalised to the signals obtained from  
930 the corresponding input sample ( $\Delta Ct = Ct_{IP} - Ct_{Input}$ ). Next, the input-normalised signals ( $\Delta Ct$ )  
931 were normalised to the corresponding 0 time-point control (i.e.  $\Delta\Delta Ct = \Delta Ct - \Delta Ct_0$ ). The fold  
932 enrichment of each time-point was then calculated with the  $2^{-\Delta\Delta Ct}$  formula.

933

#### 934 *Statistical analysis*

935 Experimental data are presented as means + s.d., or means  $\pm$  s.e.m. for *in vivo* results, unless  
936 otherwise stated in figure legends. Sample size and number of repeats are indicated in the  
937 respective sub-legend, when they apply to specific panels, or in the end, when they apply to  
938 all above panels in the figure. Statistical significance was calculated by two-tailed unpaired  
939 Student's *t*-test. In the figures, only  $p < 0.05$  values are shown above horizontal brackets  
940 indicating the samples being compared. GraphPad Prism software (version 8.4.2) was used  
941 for statistical analysis.

942

#### 943 *Biological materials*

944 All unique materials are readily available from the corresponding authors upon request. The  
945 availability of the antibodies recognising VACV antigens and VACV proteins A49, C6 and D8  
946 is limited.

947

#### 948 *Data availability*

949 The authors declare that the main data supporting the findings of this study are available within  
950 the article and its supplementary material. Extra data are available from the corresponding  
951 authors upon request.

952

953 FIGURE LEGENDS

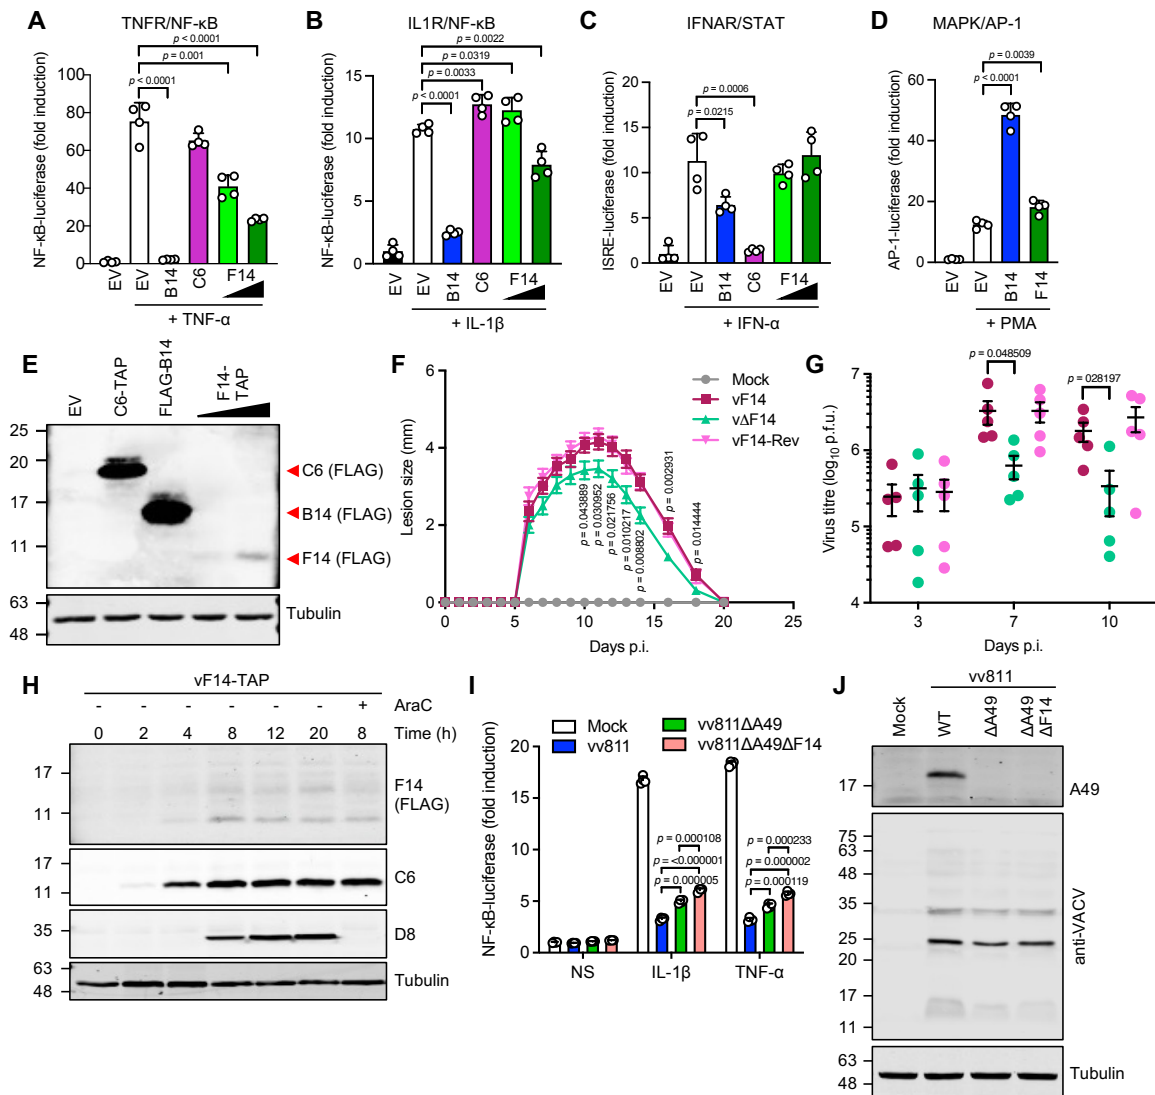

954

955 **Figure 1: Vaccinia virus protein F14 inhibits NF-κB activation and contributes to**  
 956 **virulence.** (A-D) NF-κB- (A, B), IFNAR/STAT- (C), or MAPK/AP-1- (D) dependent luciferase  
 957 activities in HEK 293T cells transfected with vectors expressing the indicated VACV proteins  
 958 or empty vector (EV), and stimulated with TNF-α, IL-1β, IFN-α or PMA (as indicated). Means  
 959 + s.d. (n = 4 per condition) are shown. (E) Immunoblotting of whole cell lysates of transfected  
 960 HEK 293T cells. (F) C57BL/6 mice were infected intradermally in both ears with 10<sup>4</sup> p.f.u. of  
 961 the indicated VACV strains and the lesions were measured daily. Means ± s.e.m. (n = 10 mice)  
 962 are shown. (G) Virus titres in the ears of mice infected as in (F). Means ± s.e.m. (n = 5 mice)  
 963 are shown. (H) Immunoblotting of protein extracts from HeLa cells infected with vF14-TAP (5  
 964 p.f.u./cell) and treated with cytosine arabinoside (AraC, 40 μg/ml) where indicated. (I) NF-κB-  
 965 dependent luciferase activity in A549 cells infected with VACV vv811 strains (5 p.f.u./cell, 6 h)  
 966 and stimulated with TNF-α or IL-1β for additional 6 h. Means + s.d. (n = 4 per condition) are  
 967 shown. (J) Immunoblotting of protein extracts from A549 cells infected as in (I). The positions  
 968 of molecular mass markers in kDa are shown on the left of immunoblots. Immunoblots of  
 969 tagged proteins are labelled with the protein name followed the epitope tag antibody in  
 970 parentheses. When multiple tagged proteins are shown in the same immunoblot, each protein  
 971 is indicated by a red arrowhead. Statistical significance was determined by the Student's *t*-



972 test. Data shown in (**A-D, I**), (**F, G**) and (**E, H, J**) are representative of four, two or three  
973 separate experiments, respectively.

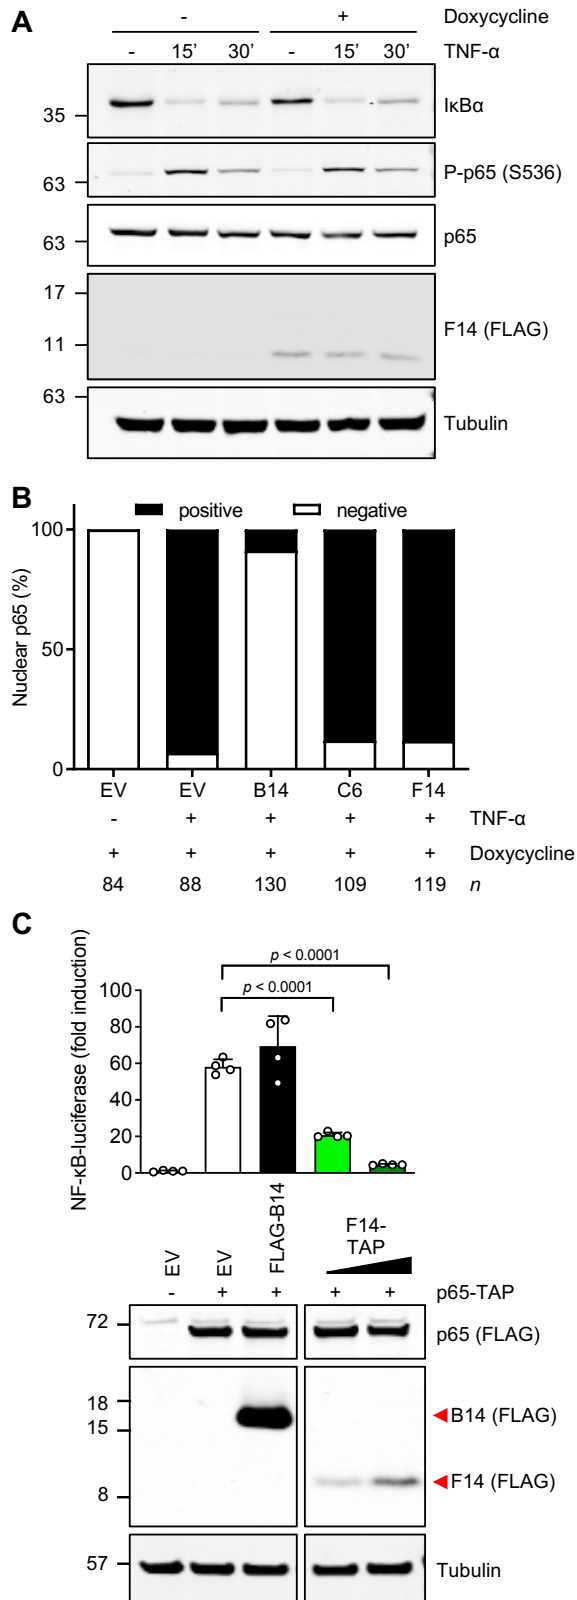

974

975 **Figure 2: F14 inhibits NF- $\kappa$ B at or downstream of p65.** (A) Immunoblotting of protein  
 976 extracts from T-REx-293 cells inducibly expressing F14, after doxycycline induction overnight  
 977 and TNF- $\alpha$  stimulation. Data are representative of three independent experiments. (B)  
 978 Quantification of NF- $\kappa$ B p65 localisation after immunofluorescence of T-REx-293 cells  
 979 inducibly expressing the empty vector (EV) or VACV proteins B14, C6 or F14, induced with  
 980 doxycycline and stimulated with TNF- $\alpha$  for 15 min. Number of cells counted from two

981 independent experiments ( $n$ ) is stated below each bar. **(C)** NF- $\kappa$ B activity in HEK 293T cells  
982 transfected with vectors expressing p65, VACV proteins B14 or F14, or empty vector (EV).  
983 Top panel: Means + s.d. ( $n = 4$  per condition) are shown. Statistical significance was  
984 determined by Student's  $t$ -test. Bottom panel: Immunoblotting. Protein molecular mass  
985 markers in kDa are shown on the left of the blots. Immunoblots of tagged proteins are labelled  
986 with the protein name followed by the epitope tag antibody in parentheses. When multiple  
987 tagged proteins are shown in the same immunoblot, each protein is indicated by a red  
988 arrowhead.

989

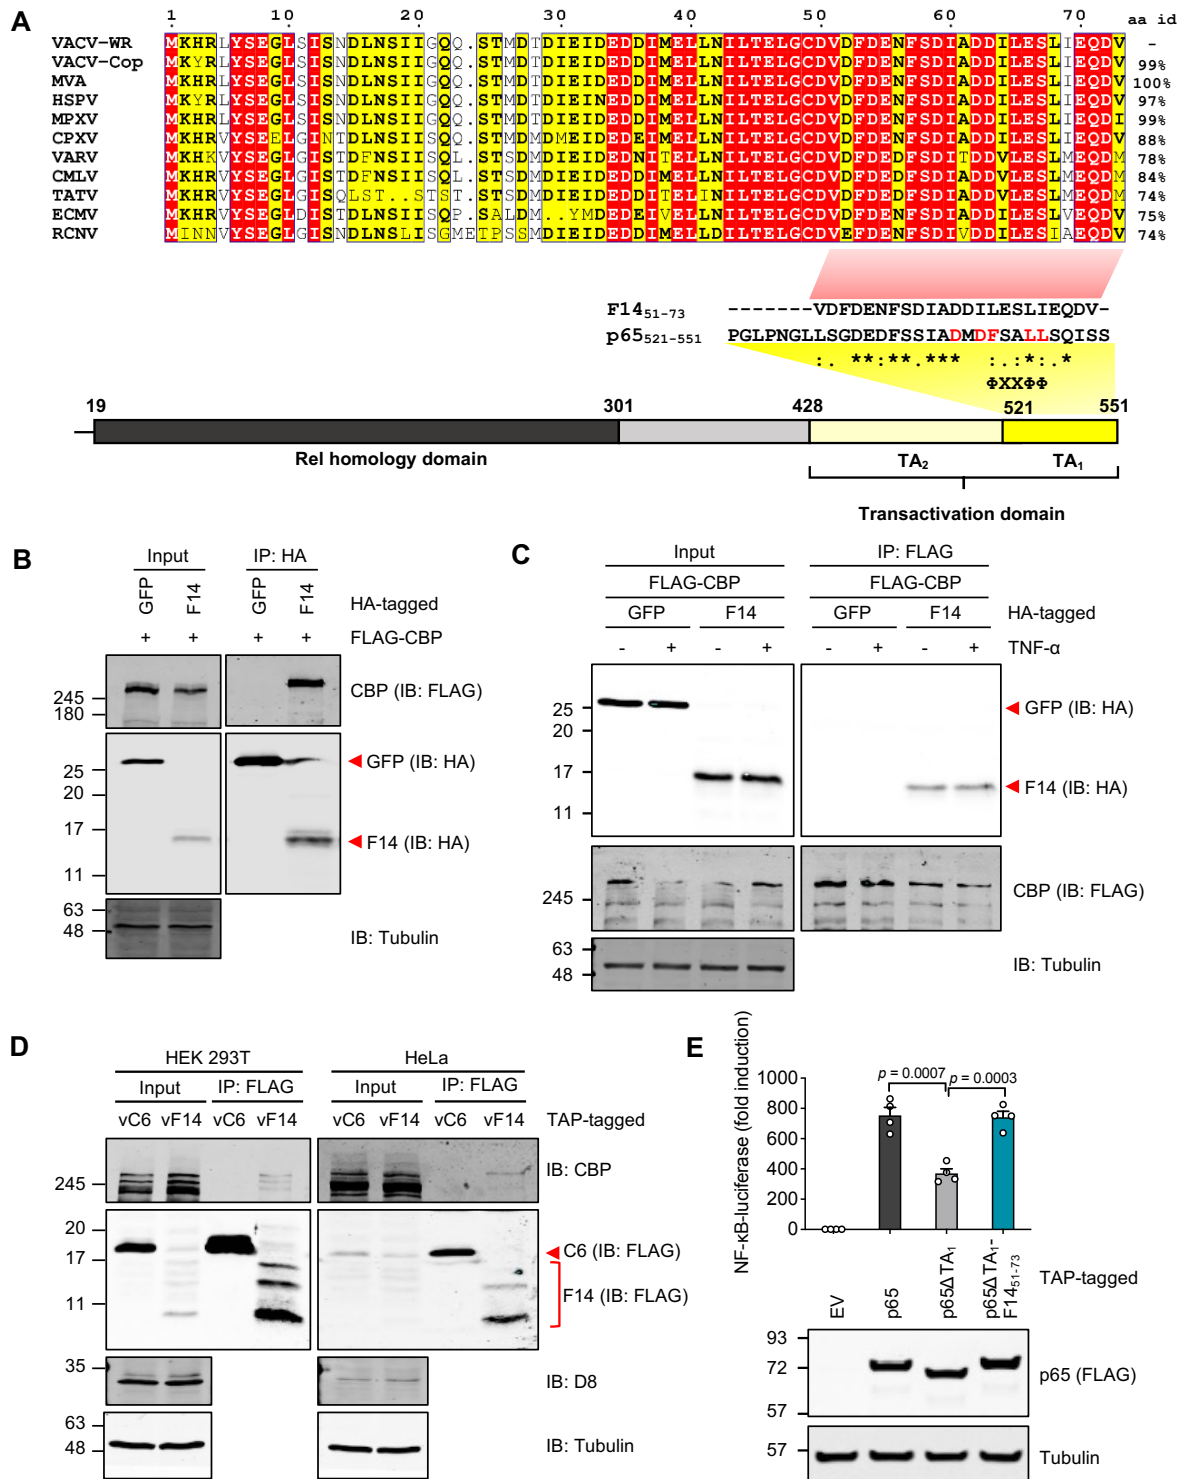

990

991 **Figure 3: F14 binds to CBP and has transactivation activity.** (A) Top: Amino acid  
 992 alignment of F14 orthologues of representative orthopoxviruses: vaccinia virus (VACV)  
 993 Western Reserve (WR), VACV Copenhagen (Cop), modified vaccinia Ankara (MVA),  
 994 horsepox virus (HSPV), monkeypox virus (MPXV), cowpox virus (CPXV), variola virus  
 995 (VARV), camelpox virus (CMLV), taterapox virus (TATV), ectromelia virus (ECMV), and  
 996 racoonpox virus (RCNV). Red, aa identical in all sequences; yellow, aa identical in at least  
 997 8/11 sequences. The percent aa identity of F14 orthologues compared to the F14 protein of  
 998 VACV-WR are shown on the right. Bottom: Alignment of the C-termini of F14 and p65  
 999 highlighting their sequence similarity including the ΦXXΦΦ motif, above a schematic of p65

1000 and its functional domains. Asterisks (\*), identical aa; colons (:), conservative aa change; dots  
1001 (.), non-conservative aa change. Nucleotide sequences used for this study are listed in Table  
1002 S1. **(B, C)** Lysates from transfected HEK 293T cells were immunoprecipitated with anti-HA  
1003 **(B)** or anti-FLAG **(C)**. Immunoblots are representative of three independent experiments. **(D)**  
1004 HEK 293T and HeLa cells were infected with VACV strains vC6-TAP or vF14-TAP (5  
1005 p.f.u./cell, 8 h) and lysates were immunoprecipitated with anti-FLAG. Immunoblots are  
1006 representative of two independent experiments. **(E)** NF- $\kappa$ B-dependent luciferase activity in  
1007 HEK 293T cells transfected with vectors expressing p65, p65 mutants or empty vector (EV).  
1008 Top panel: Means + s.d. ( $n = 4$  per condition) are shown. Statistical significance was  
1009 determined by the Student's *t*-test. Bottom panel: Immunoblotting. Protein molecular mass  
1010 markers in kDa are shown on the left of the blots. Immunoblots of tagged proteins are labelled  
1011 with the protein name followed the epitope tag antibody in parentheses. When multiple tagged  
1012 proteins are shown in the same immunoblot, each protein is indicated by a red arrowhead.

1013

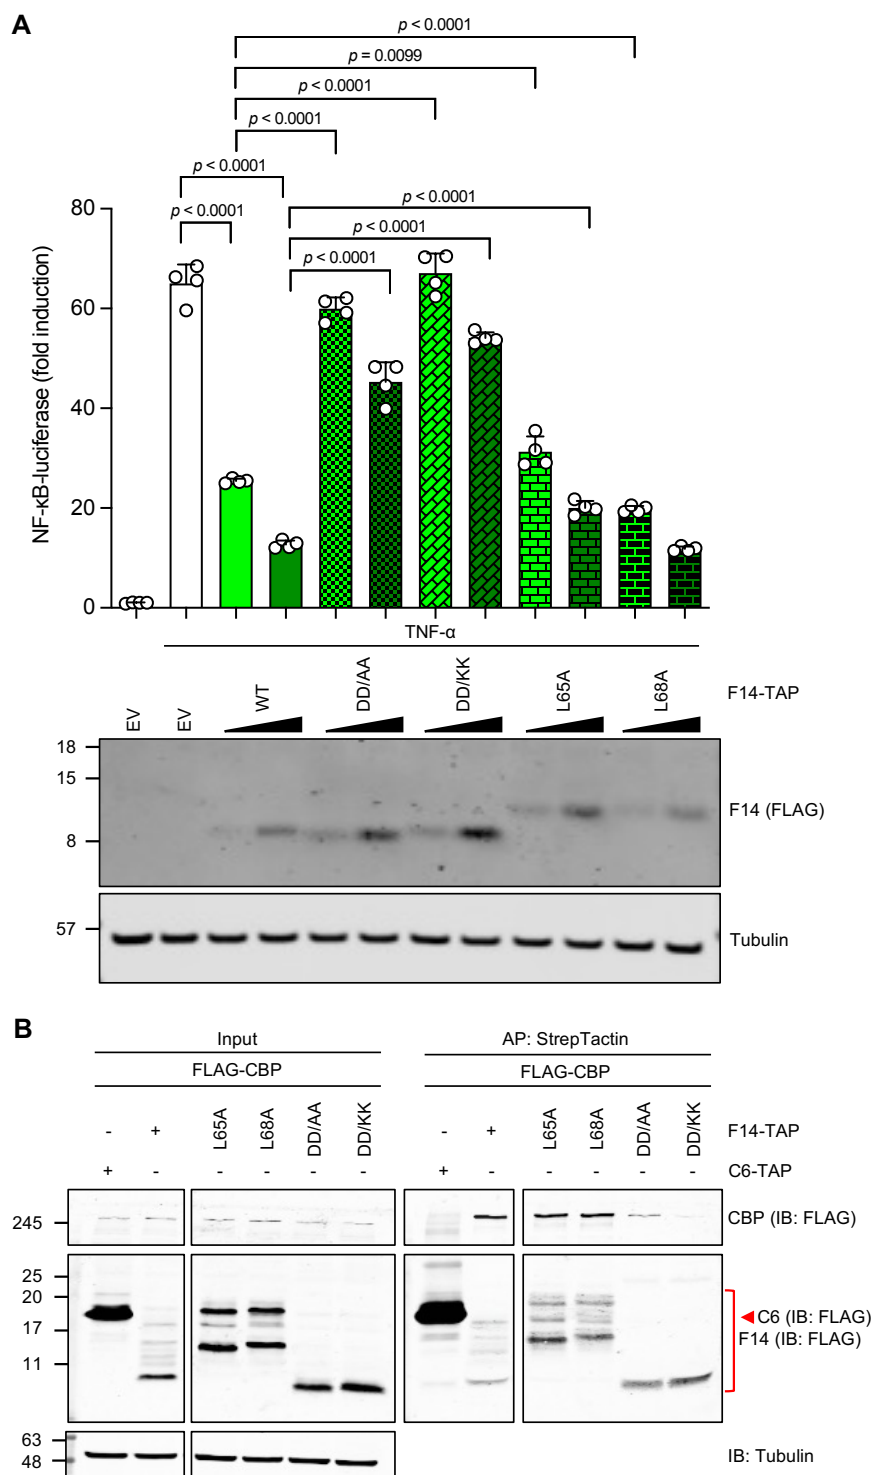

1014

1015 **Figure 4: The dipeptide D62/63 of F14 is required for inhibition of NF-κB.** (A) NF-κB-  
 1016 dependent luciferase activity in HEK 293T cells transfected with vectors expressing F14, F14  
 1017 mutants, or empty vector (EV), and stimulated with TNF-α for 8 h. Top panel: Means + s.d. (*n*  
 1018 = 4 per condition) are shown. Statistical significance was determined by the Student's *t*-test.  
 1019 Bottom panel: Immunoblotting. (B) Lysates from transfected HEK 293T cells were affinity-  
 1020 purified with StrepTactin resin. DD/AA denotes D62/63A mutant and DD/KK, D62/63K mutant.  
 1021 Protein molecular mass markers in kDa are shown on the left of the blots. Immunoblots of  
 1022 tagged proteins are labelled with the protein name followed the epitope tag antibody in

1023 parentheses. When multiple tagged proteins are shown in the same immunoblot, each protein  
1024 is indicated by a red arrowhead. Data are representative of three independent experiments.  
1025

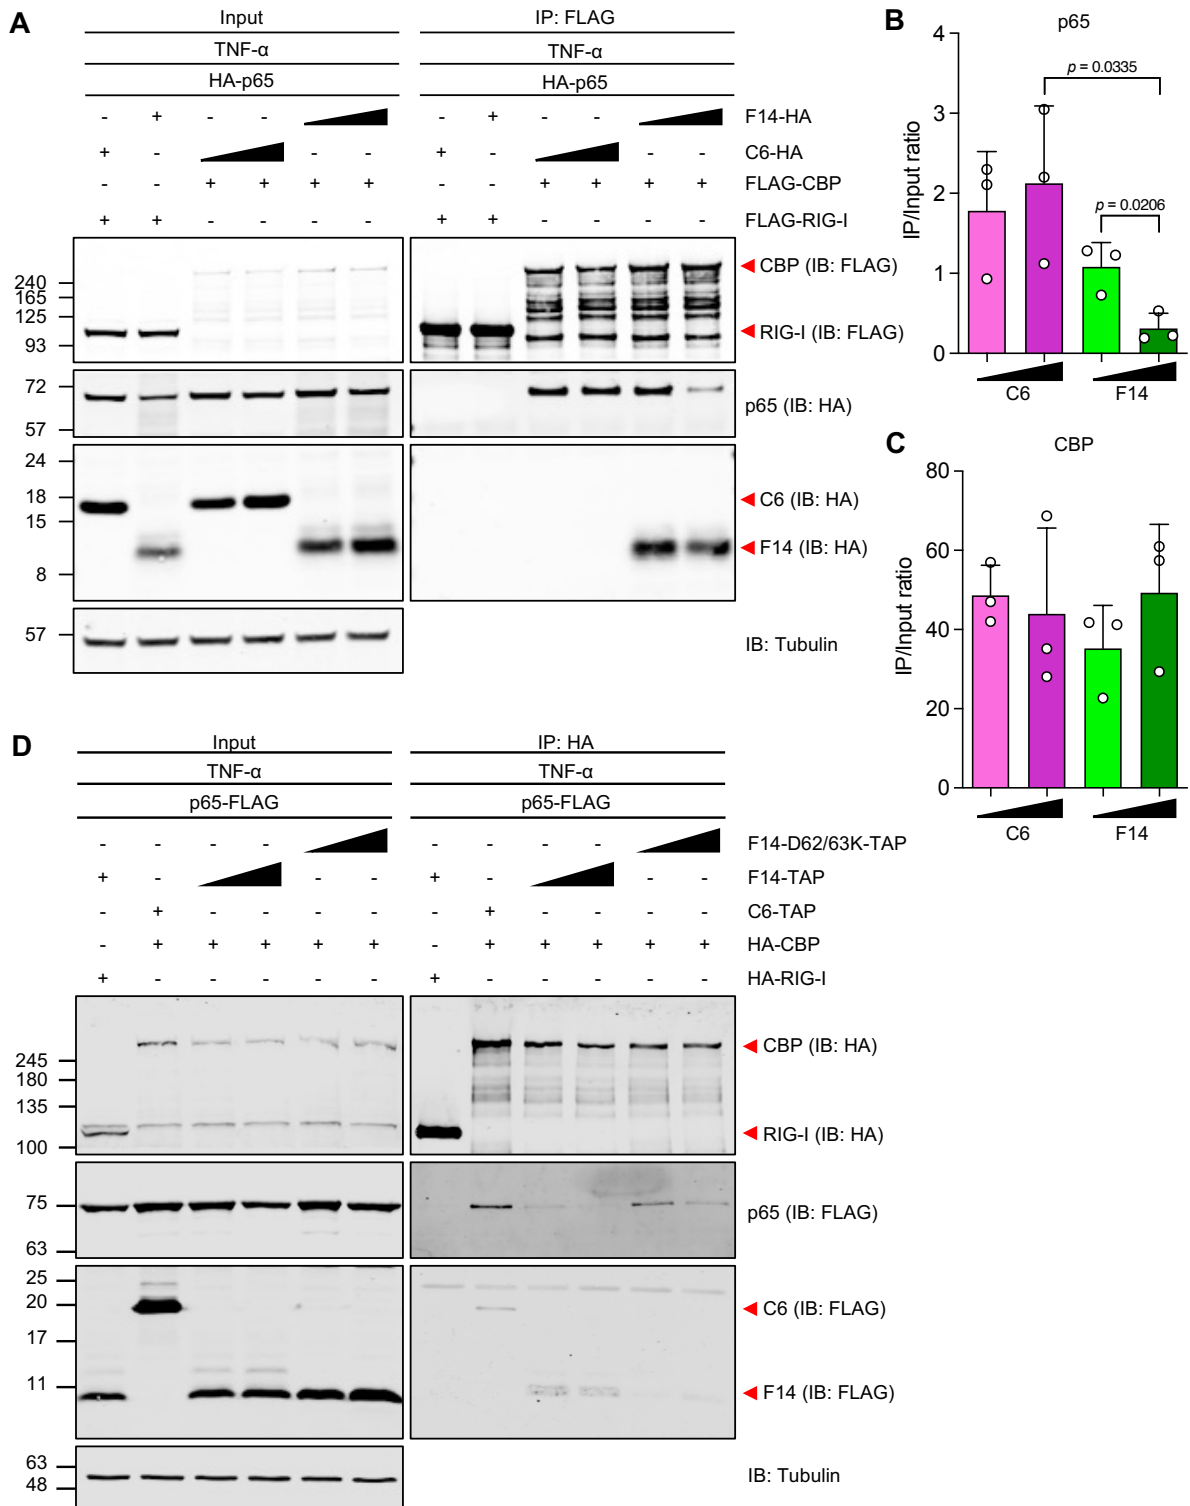

1026

1027 **Figure 5: F14 outcompetes NF- $\kappa$ B for binding to CBP.** (A, D) Lysates from transfected HEK  
 1028 293T cells were immunoprecipitated with anti-FLAG (A) or anti-HA (D) after TNF- $\alpha$  stimulation.  
 1029 Immunoblots are representative of three independent experiments. (B, C) Ratio of  
 1030 immunoprecipitate (IP) over input signal intensities from immunoblots as in (A). Means + s.d.  
 1031 ( $n = 3$  independent experiments) are shown. Statistical significance was determined by the  
 1032 Student's *t*-test. Protein molecular mass markers in kDa are shown on the left of the blots.  
 1033 Immunoblots of tagged proteins are labelled with the protein name followed the epitope tag



1034 antibody in parentheses. When multiple tagged proteins are shown in the same immunoblot,  
1035 each protein is indicated by a red arrowhead.

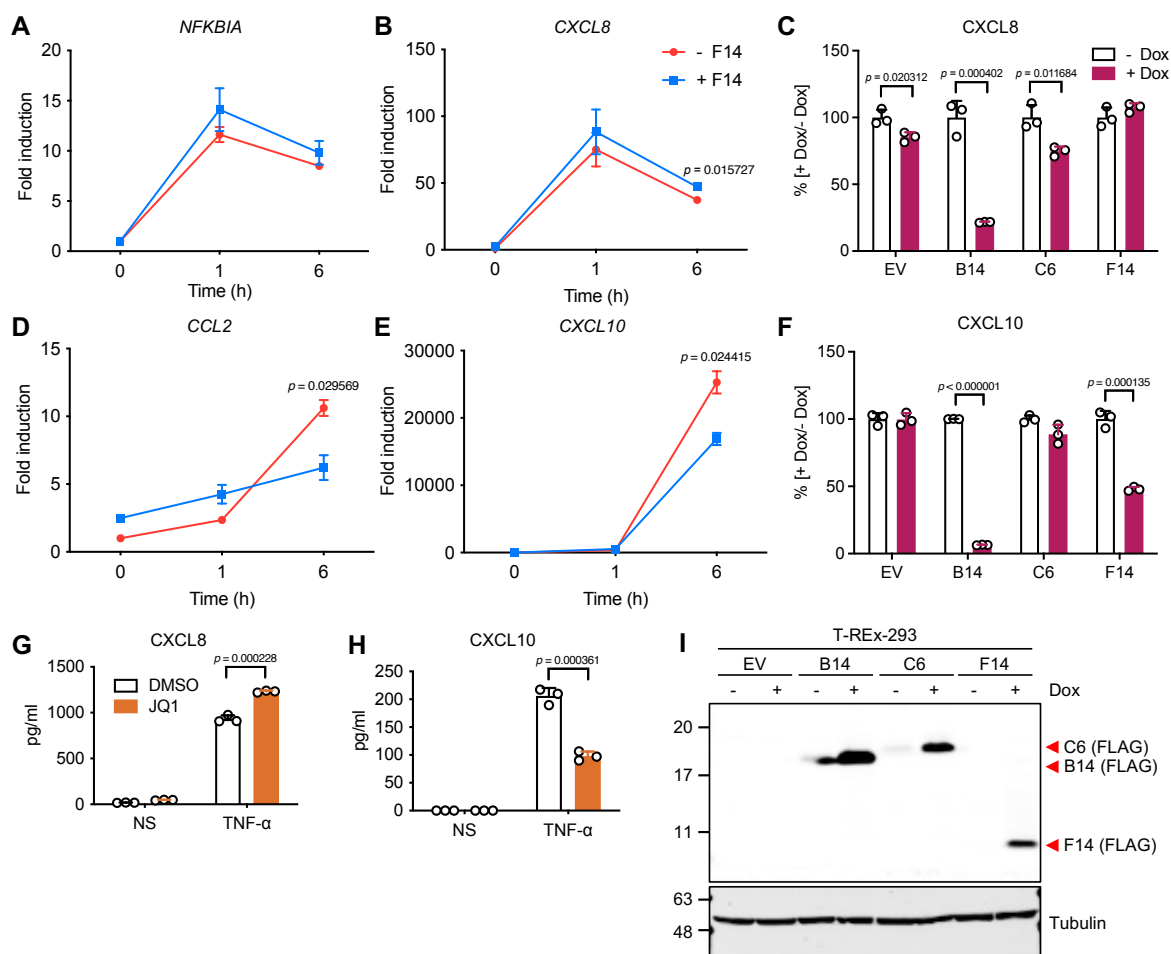

1036

1037 **Figure 6: F14 suppresses expression of a subset of NF-κB-responsive genes. (A, B, D,**  
 1038 **E)** RT-qPCR analysis of NF-κB-responsive gene expression in inducible T-REx-293-F14 cells  
 1039 in the absence (– F14) or in the presence (+ F14) of doxycycline overnight, and stimulated  
 1040 with TNF-α. Means ± s.d. (*n* = 2 per condition) are shown. **(C, F)** ELISA of culture supernatants  
 1041 from T-REx-293 cells inducibly expressing the empty vector (EV) or VACV proteins B14, C6,  
 1042 or F14, induced overnight with doxycycline and stimulated with TNF-α for 16 h. Means + s.d.  
 1043 (*n* = 3 per condition) of the percent of secretion in presence of doxycycline (+ Dox) versus in  
 1044 the absence of doxycycline (– Dox, equals 100%) are shown. **(G, H)** ELISA of culture  
 1045 supernatants from T-REx-293-EV cells stimulated with TNF-α for 16 h in the absence or in the  
 1046 presence of JQ1. Means ± s.d. (*n* = 3 per condition) are shown. **(I)** Immunoblotting of lysates  
 1047 of inducible T-REx-293 cell lines in the absence or in the presence of doxycycline overnight.  
 1048 Protein molecular masses in kDa are shown on the left of the blots. Immunoblots of tagged  
 1049 proteins are labelled with the protein name followed the epitope tag antibody in parentheses.  
 1050 When multiple tagged proteins are shown in the same immunoblot, each protein is indicated  
 1051 by a red arrowhead. Statistical significance was determined by the Student's *t*-test.

1052

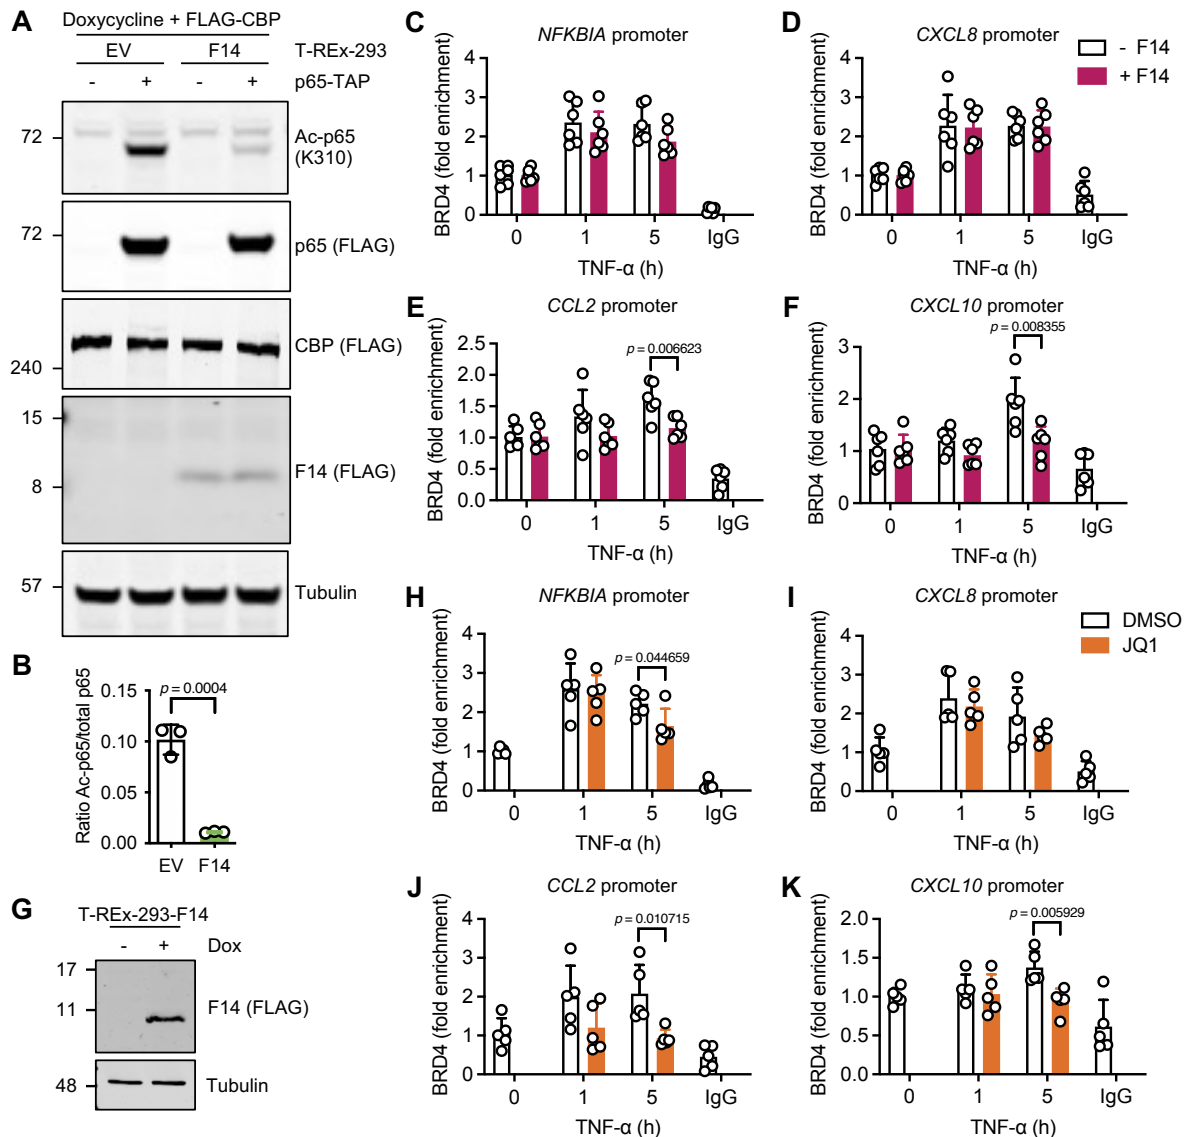

1053

1054 **Figure 7: F14 antagonises p65 acetylation and inducible recruitment of BRD4 to CCL2**  
 1055 **and CXCL10 promoters.** (A) Immunoblotting of protein lysates from T-REx-293 cells stably  
 1056 transfected with empty vector (EV) or inducibly expressing F14, induced with doxycycline and  
 1057 transfected with plasmids expressing p65 and CBP. Blots are representative of two  
 1058 independent experiments carried out with three biological replicates each. (B) Ratio of  
 1059 acetylated (Ac) p65 over total ectopic p65 signal intensities from immunoblots as in (A). Means  
 1060 + s.d. ( $n = 3$  per condition) are shown. (C-F, H-K) Chromatin immunoprecipitation (ChIP) with  
 1061 anti-BRD4 antibody or control IgG, and qPCR for the promoters of *NFKBIA* (C, H), *CXCL8* (D,  
 1062 I), *CCL2* (E, J) and *CXCL10* (F, K) genes. T-REx-293-F14 were left uninduced (- F14) or  
 1063 induced with doxycycline (+ F14) and stimulated with TNF- $\alpha$  (C-F). Alternatively, T-REx-293  
 1064 cells were treated with JQ1 before TNF- $\alpha$  stimulation (H, K). Means + s.d. ( $n = 5-6$  per  
 1065 condition from two independent experiments) are shown. (G) Immunoblotting from (C-F).  
 1066 Protein molecular mass markers in kDa are shown on the left of the blots. Immunoblots of  
 1067 tagged proteins are labelled with the protein name followed the epitope tag antibody in  
 1068 parentheses. When multiple tagged proteins are shown in the same immunoblot, each protein  
 1069 is indicated a red arrowhead. Statistical significance was determined by the Student's *t*-test.

1070

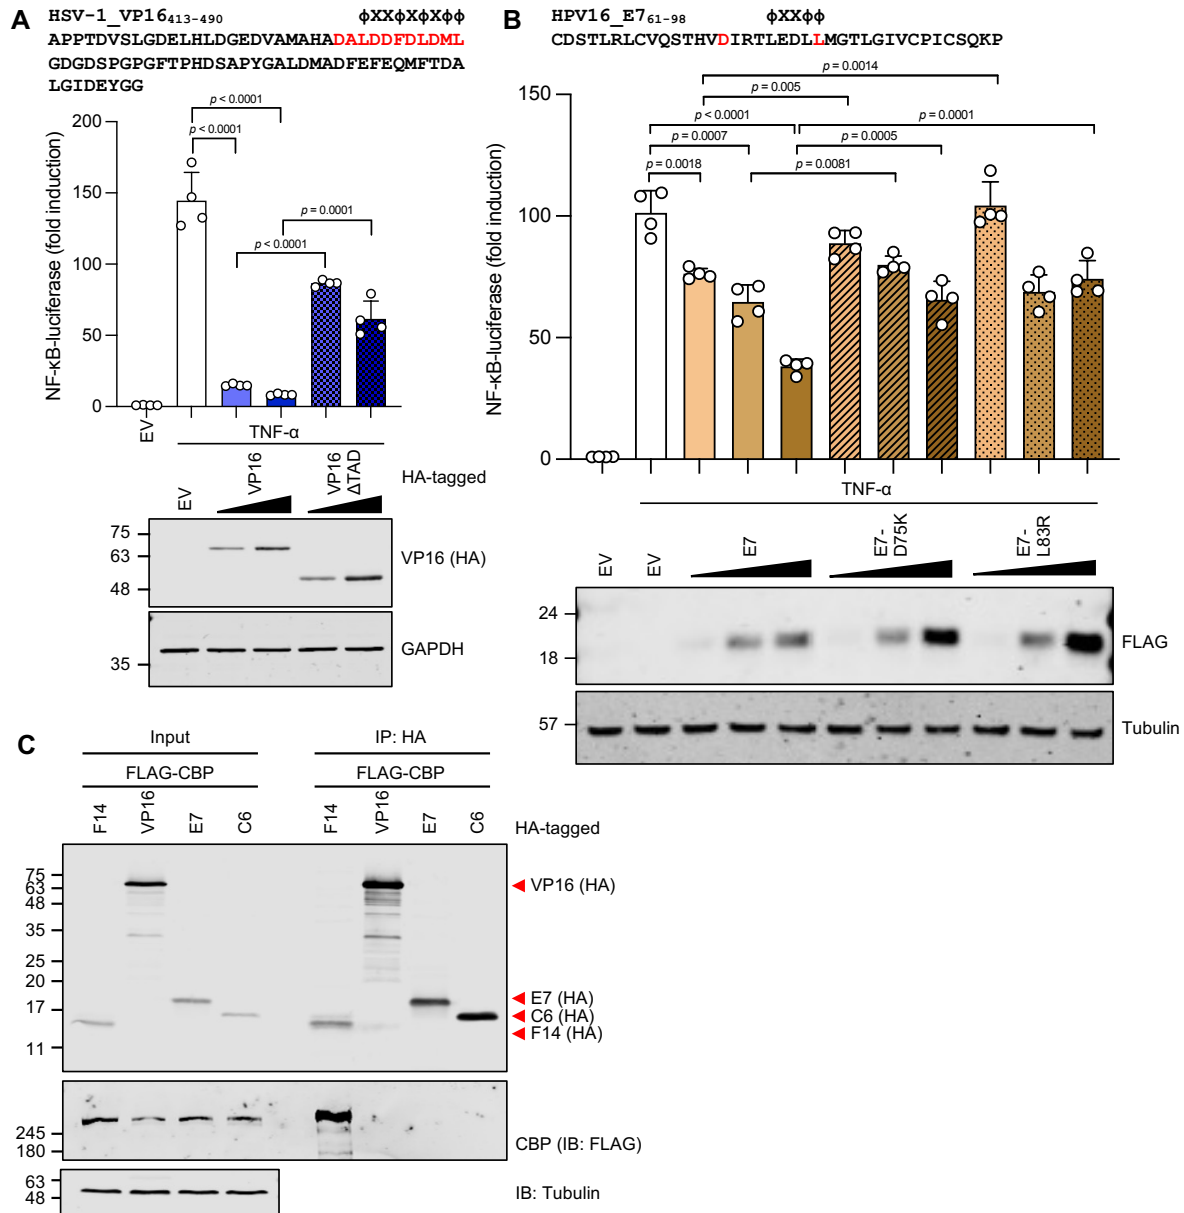

1071

1072 **Figure 8: F14 is unique among known viral inhibitors of NF-κB.** (A) Top: Amino acid  
 1073 sequence of the TAD of HSV-1 VP16 with the acidic activation domain similar to p65  
 1074 highlighted in red, and hydrophobic residues ( $\Phi$ ) are indicated. Middle: NF-κB-dependent  
 1075 luciferase activity in HEK 293T cells transfected with vectors expressing VP16, VP16 mutant,  
 1076 or empty vector (EV), and stimulated with TNF- $\alpha$ . Bottom: Immunoblotting. (B) Top: Amino  
 1077 acid residues 61-98 from HPV16 protein E7 encompassing a  $\Phi$ X $\Phi$  $\Phi$  motif containing and  
 1078 preceded by negatively charged residues. Highlighted are two residues mutated to disrupt this  
 1079 motif. Middle: NF-κB-dependent luciferase activity in HEK 293T cells expressing E7 and two  
 1080 mutants as described in (A). Bottom: Immunoblotting. Means + s.d. ( $n = 4$  per condition) are  
 1081 shown. (C) Lysates from transfected HEK 293T cells were immunoprecipitated with anti-HA.  
 1082 Immunoblots are representative of two independent experiments. Protein molecular masses  
 1083 in kDa are shown on the left of the blots. Immunoblots of tagged proteins are labelled with the  
 1084 protein name followed the epitope tag antibody in parentheses. When multiple tagged proteins  
 1085 are shown in the same immunoblot, each protein is indicated a red arrowhead. Statistical  
 1086 significance was determined by the Student's *t*-test.

1087

1088 SUPPLEMENTARY MATERIAL

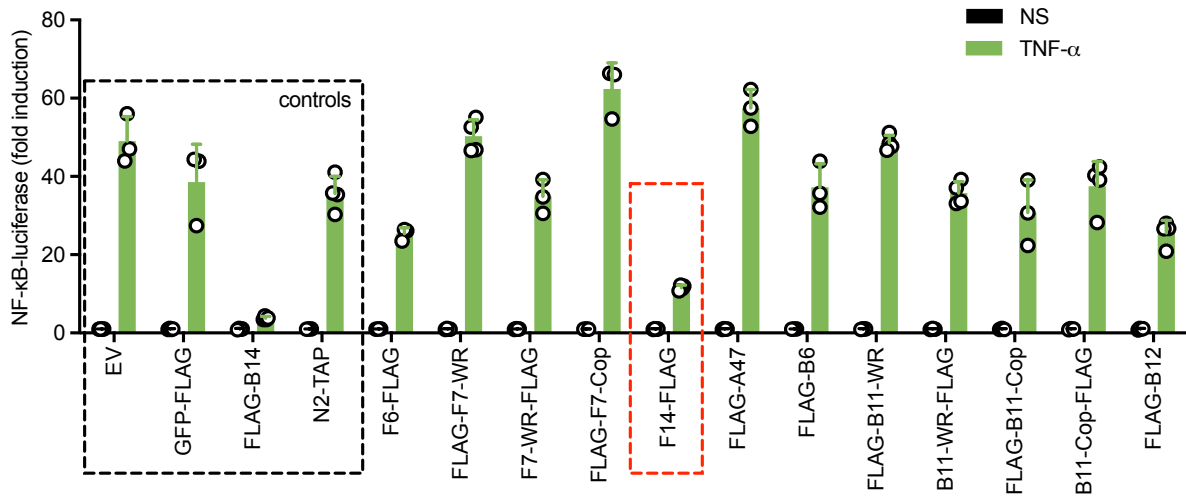

1089

1090 **Figure S1, related to Figure 1: Screen of VACV strain WR ORFs for NF- $\kappa$ B inhibitory**  
1091 **activity.** NF- $\kappa$ B-dependent luciferase activity in HEK 293T cells transfected with vectors  
1092 expressing the indicated VACV proteins or empty vector (EV), and stimulated with TNF- $\alpha$ .  
1093 Negative (EV, GFP, and N2) and positive (B14) controls are highlighted in the dashed black  
1094 square, whilst F14 is highlighted in the dashed red square. Means + s.d. ( $n = 4$  per condition)  
1095 are shown.

1096

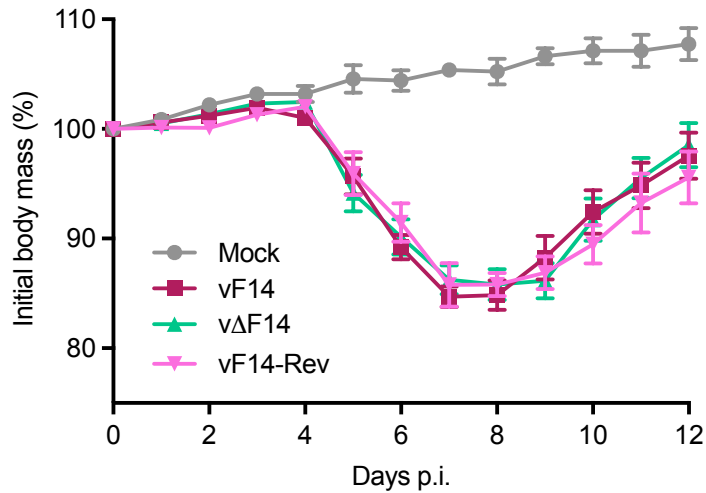

1097

1098 **Figure S2, related to Figure 1: Virulence of VACV mutant lacking F14 in the intranasal**  
1099 **mouse model of infection.** BALB/c mice were infected intranasally with  $5 \times 10^3$  p.f.u. of the  
1100 indicated VACV strains and their body mass was measured daily. Body mass is expressed as  
1101 the percentage  $\pm$  s.e.m. of the mean of the same group of mice on day 0 ( $n = 10$  mice).

1102

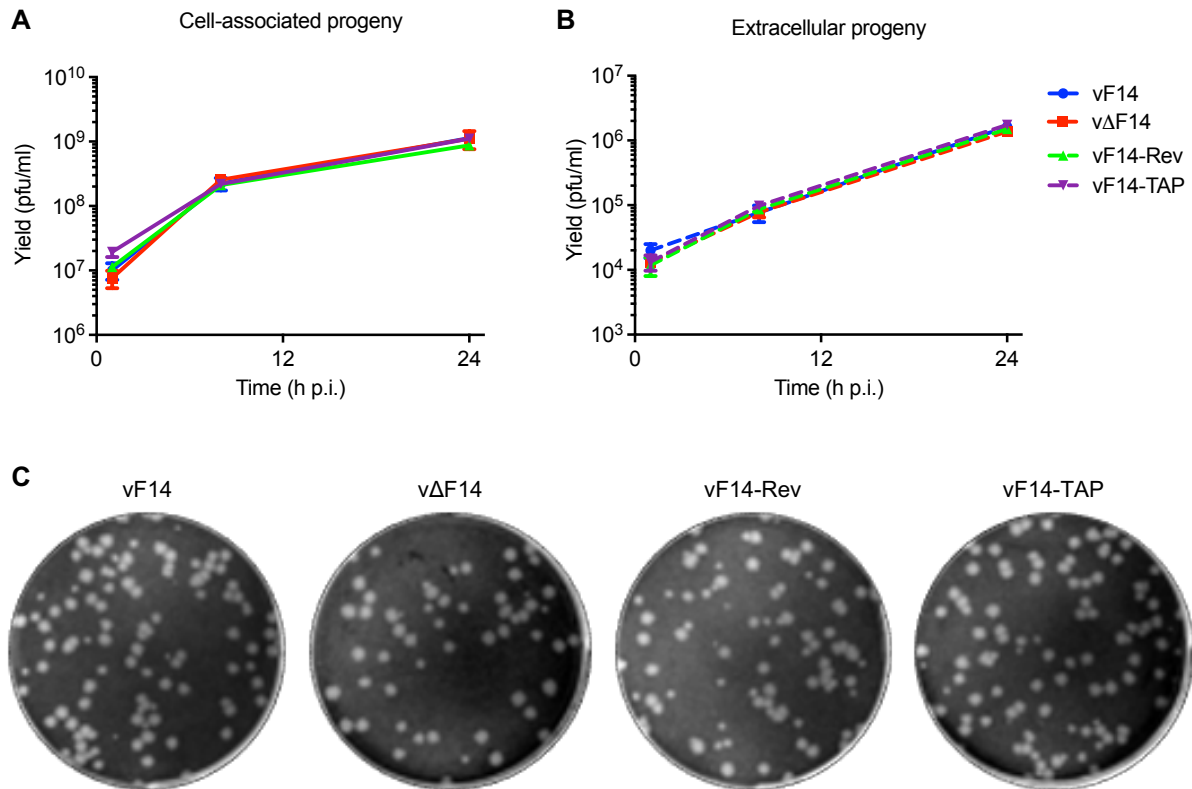

1103

1104 **Figure S3, related to Figure 1: Replication and spread of VACV mutant lacking F14 in**  
1105 **cell culture. (A, B)** HeLa cells were infected with the indicated VACV strains (5 p.f.u./cell) and  
1106 virus titres associated with the cells **(A)** and in the supernatants **(B)** were determined by plaque  
1107 assay. Means  $\pm$  s.d. (n = 2 per condition) are shown. **(C)** Plaque formation by the indicated  
1108 VACV strains on BS-C-1 cells.

1109

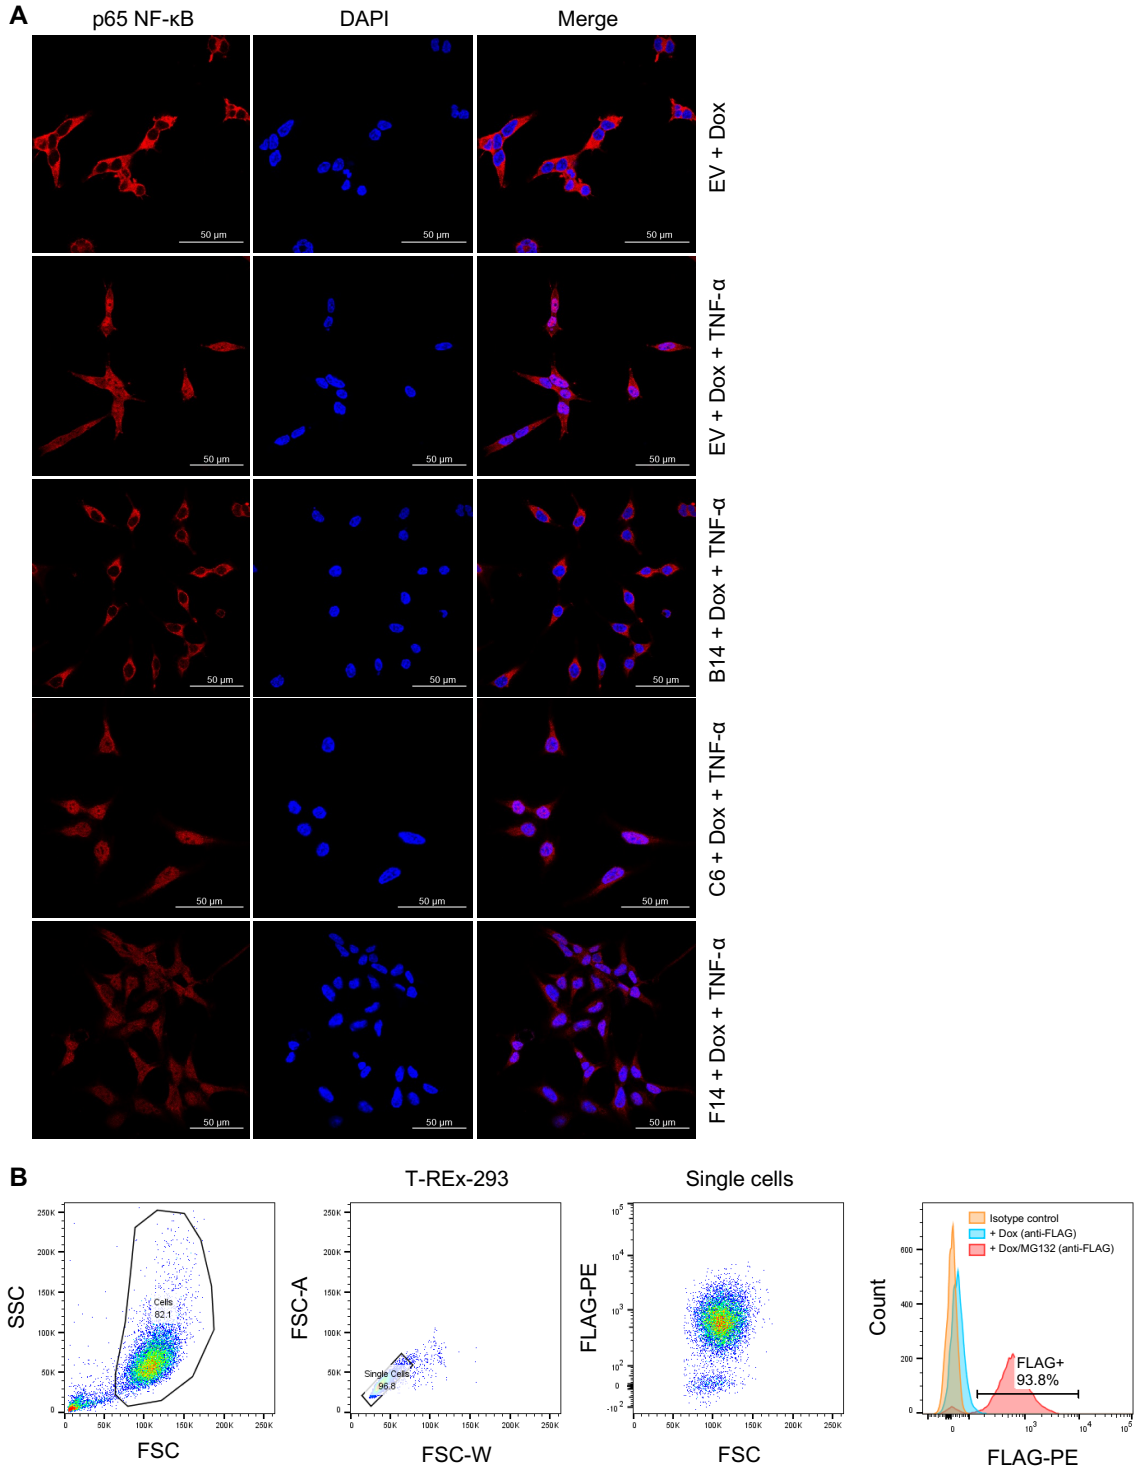

1110

1111 **Figure S4, related to Figure 2: F14 does not inhibit the nuclear translocation of NF- $\kappa$ B**  
 1112 **subunit p65. (A)** T-REx-293 cells inducibly expressing the empty vector (EV) or VACV  
 1113 proteins B14, C6, or F14, were induced with doxycycline and stimulated with TNF- $\alpha$ . Fixed  
 1114 and permeabilised cells were stained with anti-p65 antibody and DAPI, and analysed by  
 1115 confocal microscopy. Scale bars (50  $\mu$ m) are shown in the bottom right of each micrograph.  
 1116 Representative micrographs of quantitative analysis shown in Figure 2B. **(B)** Flow cytometry  
 1117 analysis of T-REx-293-F14 induced with doxycycline in the absence and in the presence of  
 1118 the proteasome inhibitor MG132. F14 presence was detected by staining with an anti-FLAG  
 1119 antibody.



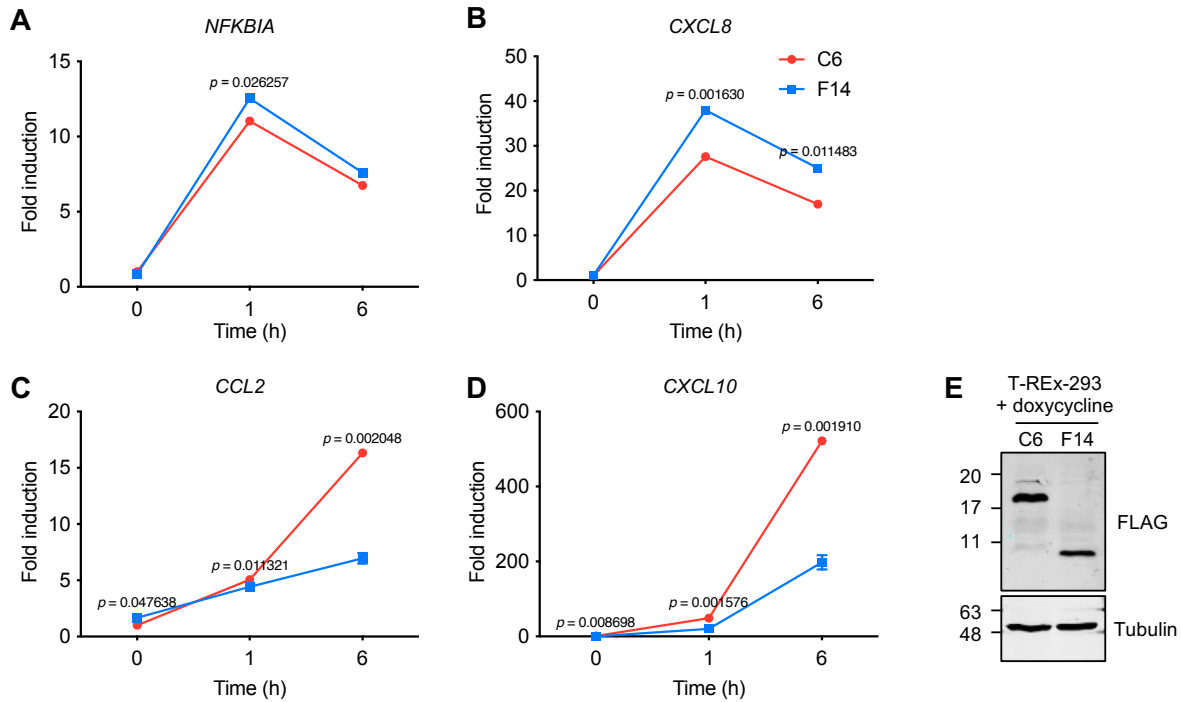

1120

1121 **Figure S5, related to Figure 6: F14 suppresses expression of a subset of NF-κB-**  
 1122 **responsive genes. (A-D)** RT-qPCR analysis of NF-κB-responsive gene expression in  
 1123 inducible T-REx-293 cells induced with doxycycline overnight to express VACV proteins F14  
 1124 or C6, and stimulated with TNF-α. Means ± s.d. ( $n = 2$  per condition) are shown. Statistical  
 1125 significance was determined by the Student's *t*-test. **(E)** Immunoblotting of lysates of inducible  
 1126 T-REx-293 cell lines induced with doxycycline overnight. Protein molecular masses in kDa are  
 1127 shown on the left of the blots.

1128

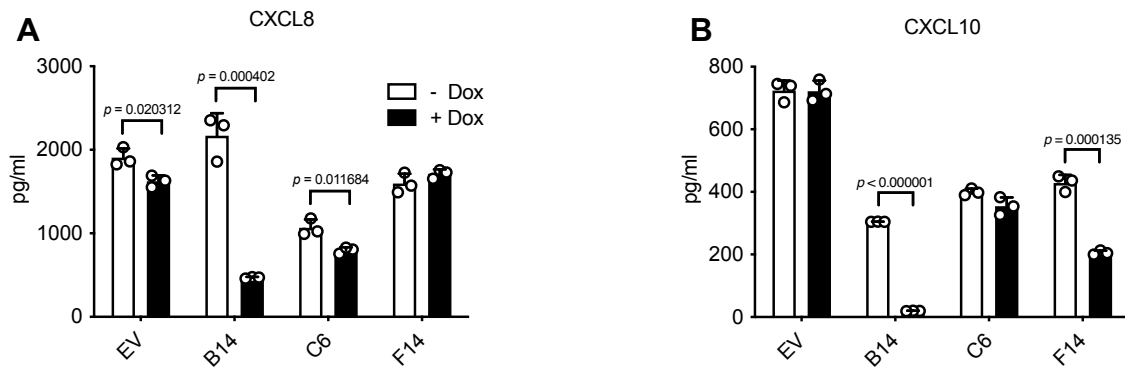

1129

1130 **Figure S6, related to Figure 6: F14 suppresses expression of CXCL10, but not CXCL8,**  
1131 **after stimulation with TNF- $\alpha$ .** This shows data normalised for presentation in Figure 6C, F.  
1132 ELISA of culture supernatants from T-REx-293 cells inducibly expressing the empty vector  
1133 (EV) or VACV proteins B14, C6, or F14, induced with doxycycline and stimulated with TNF- $\alpha$ .  
1134 Means + s.d. ( $n = 3$  per condition) are shown. Statistical significance was determined by the  
1135 Student's  $t$ -test.

1136

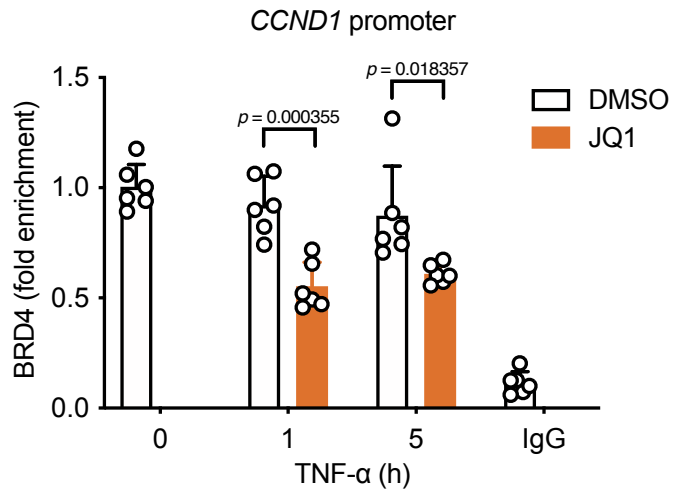

1137

1138 **Figure S7, related to Figure 7: JQ1 reduces BRD4 occupancy on *CCND1* gene promoter.**

1139 Chromatin immunoprecipitation (ChIP) with anti-BRD4 antibody or control IgG, and qPCR for

1140 the promoters of *CCND1* gene. T-REx-293 cells were treated with JQ1 and stimulated with

1141 TNF- $\alpha$ . Means + s.d. ( $n = 6$  per condition from two independent experiments). Statistical

1142 significance was determined by the Student's *t*-test.

1143

1144 **Table S1: NCBI GenBank accession numbers of poxvirus nucleotide sequences**  
1145 **mentioned in this study.**

1146 **Table S2: Oligonucleotide primers used in this study.** Primers are listed 5' to 3'. Restriction  
1147 sites used are highlighted in red and indicated in parentheses following oligonucleotide  
1148 sequence. If present, sequences coding the tag epitopes are highlighted in bold, whilst the  
1149 Kozak sequence are shown in italics. Plasmids marked with an asterisk (\*) were constructed  
1150 by site-directed mutagenesis, with the mutated codons underlined.

1151 **Table S3: Antibodies used in this study.**

1152

1153 REFERENCES

- 1154 1. Elde, N.C., et al., *Protein kinase R reveals an evolutionary model for defeating viral mimicry*.  
1155 Nature, 2009. **457**(7228): p. 485-9.
- 1156 2. Hancks, D.C., et al., *Overlapping Patterns of Rapid Evolution in the Nucleic Acid Sensors cGAS*  
1157 *and OAS1 Suggest a Common Mechanism of Pathogen Antagonism and Escape*. PLoS Genet,  
1158 2015. **11**(5): p. e1005203.
- 1159 3. Alves, J.M., et al., *Parallel adaptation of rabbit populations to myxoma virus*. Science, 2019.  
1160 **363**(6433): p. 1319-1326.
- 1161 4. Medzhitov, R., *Recognition of microorganisms and activation of the immune response*. Nature,  
1162 2007. **449**(7164): p. 819-26.
- 1163 5. Iwasaki, A., *A virological view of innate immune recognition*. Annu Rev Microbiol, 2012. **66**: p.  
1164 177-96.
- 1165 6. Griffith, J.W., C.L. Sokol, and A.D. Luster, *Chemokines and chemokine receptors: positioning*  
1166 *cells for host defense and immunity*. Annu Rev Immunol, 2014. **32**: p. 659-702.
- 1167 7. Netea, M.G., et al., *A guiding map for inflammation*. Nat Immunol, 2017. **18**(8): p. 826-831.
- 1168 8. Altan-Bonnet, G. and R. Mukherjee, *Cytokine-mediated communication: a quantitative*  
1169 *appraisal of immune complexity*. Nat Rev Immunol, 2019. **19**(4): p. 205-217.
- 1170 9. Bonilla, F.A. and H.C. Oettgen, *Adaptive immunity*. J Allergy Clin Immunol, 2010. **125**(2 Suppl  
1171 2): p. S33-40.
- 1172 10. Hayden, M.S. and S. Ghosh, *Signaling to NF-kappaB*. Genes Dev, 2004. **18**(18): p. 2195-224.
- 1173 11. Vallabhapurapu, S. and M. Karin, *Regulation and function of NF-kappaB transcription factors*  
1174 *in the immune system*. Annu Rev Immunol, 2009. **27**: p. 693-733.
- 1175 12. Brubaker, S.W., et al., *Innate immune pattern recognition: a cell biological perspective*. Annu  
1176 Rev Immunol, 2015. **33**: p. 257-90.
- 1177 13. Chen, L.F. and W.C. Greene, *Shaping the nuclear action of NF-kappaB*. Nat Rev Mol Cell Biol,  
1178 2004. **5**(5): p. 392-401.
- 1179 14. Kaikkonen, M.U., et al., *Remodeling of the enhancer landscape during macrophage activation*  
1180 *is coupled to enhancer transcription*. Mol Cell, 2013. **51**(3): p. 310-25.
- 1181 15. Tian, B., D.E. Nowak, and A.R. Brasier, *A TNF-induced gene expression program under*  
1182 *oscillatory NF-kappaB control*. BMC Genomics, 2005. **6**: p. 137.
- 1183 16. Zhao, M., et al., *Transcriptional outcomes and kinetic patterning of gene expression in*  
1184 *response to NF-kappaB activation*. PLoS Biol, 2018. **16**(9): p. e2006347.
- 1185 17. Huang, T.T., et al., *A nuclear export signal in the N-terminal regulatory domain of*  
1186 *IkappaBalpha controls cytoplasmic localization of inactive NF-kappaB/IkappaBalpha*  
1187 *complexes*. Proc Natl Acad Sci U S A, 2000. **97**(3): p. 1014-9.
- 1188 18. Johnson, C., D. Van Antwerp, and T.J. Hope, *An N-terminal nuclear export signal is required for*  
1189 *the nucleocytoplasmic shuttling of IkappaBalpha*. EMBO J, 1999. **18**(23): p. 6682-93.
- 1190 19. Barboric, M., et al., *NF-kappaB binds P-TEFb to stimulate transcriptional elongation by RNA*  
1191 *polymerase II*. Mol Cell, 2001. **8**(2): p. 327-37.
- 1192 20. Gerritsen, M.E., et al., *CREB-binding protein/p300 are transcriptional coactivators of p65*. Proc  
1193 Natl Acad Sci U S A, 1997. **94**(7): p. 2927-32.
- 1194 21. Naar, A.M., et al., *Composite co-activator ARC mediates chromatin-directed transcriptional*  
1195 *activation*. Nature, 1999. **398**(6730): p. 828-32.
- 1196 22. Schmitz, M.L., et al., *Interaction of the COOH-terminal transactivation domain of p65 NF-*  
1197 *kappa B with TATA-binding protein, transcription factor IIB, and coactivators*. J Biol Chem,  
1198 1995. **270**(13): p. 7219-26.
- 1199 23. Sheppard, K.A., et al., *Transcriptional activation by NF-kappaB requires multiple coactivators*.  
1200 Mol Cell Biol, 1999. **19**(9): p. 6367-78.
- 1201 24. van Essen, D., et al., *Two modes of transcriptional activation at native promoters by NF-kappaB*  
1202 *p65*. PLoS Biol, 2009. **7**(3): p. e73.

- 1203 25. Sacconi, S., S. Pantano, and G. Natoli, *Modulation of NF-kappaB activity by exchange of dimers*.  
1204 Mol Cell, 2003. **11**(6): p. 1563-74.
- 1205 26. Ashall, L., et al., *Pulsatile stimulation determines timing and specificity of NF-kappaB-*  
1206 *dependent transcription*. Science, 2009. **324**(5924): p. 242-6.
- 1207 27. Hoffmann, A., et al., *The IkappaB-NF-kappaB signaling module: temporal control and selective*  
1208 *gene activation*. Science, 2002. **298**(5596): p. 1241-5.
- 1209 28. Jin, F., et al., *PU.1 and C/EBP(alpha) synergistically program distinct response to NF-kappaB*  
1210 *activation through establishing monocyte specific enhancers*. Proc Natl Acad Sci U S A, 2011.  
1211 **108**(13): p. 5290-5.
- 1212 29. Ramirez-Carrozzi, V.R., et al., *A unifying model for the selective regulation of inducible*  
1213 *transcription by CpG islands and nucleosome remodeling*. Cell, 2009. **138**(1): p. 114-28.
- 1214 30. Ainbinder, E., et al., *Mechanism of rapid transcriptional induction of tumor necrosis factor*  
1215 *alpha-responsive genes by NF-kappaB*. Mol Cell Biol, 2002. **22**(18): p. 6354-62.
- 1216 31. Sacconi, S., S. Pantano, and G. Natoli, *Two waves of nuclear factor kappaB recruitment to*  
1217 *target promoters*. J Exp Med, 2001. **193**(12): p. 1351-9.
- 1218 32. Huang, B., et al., *Posttranslational modifications of NF-kappaB: another layer of regulation for*  
1219 *NF-kappaB signaling pathway*. Cell Signal, 2010. **22**(9): p. 1282-90.
- 1220 33. Perkins, N.D., *Post-translational modifications regulating the activity and function of the*  
1221 *nuclear factor kappa B pathway*. Oncogene, 2006. **25**(51): p. 6717-30.
- 1222 34. Sakurai, H., et al., *IkappaB kinases phosphorylate NF-kappaB p65 subunit on serine 536 in the*  
1223 *transactivation domain*. J Biol Chem, 1999. **274**(43): p. 30353-6.
- 1224 35. Zhong, H., R.E. Voll, and S. Ghosh, *Phosphorylation of NF-kappa B p65 by PKA stimulates*  
1225 *transcriptional activity by promoting a novel bivalent interaction with the coactivator*  
1226 *CBP/p300*. Mol Cell, 1998. **1**(5): p. 661-71.
- 1227 36. Chen, L.F., et al., *NF-kappaB RelA phosphorylation regulates RelA acetylation*. Mol Cell Biol,  
1228 2005. **25**(18): p. 7966-75.
- 1229 37. Wang, Z., et al., *Genome-wide mapping of HATs and HDACs reveals distinct functions in active*  
1230 *and inactive genes*. Cell, 2009. **138**(5): p. 1019-31.
- 1231 38. Yang, F., et al., *IKK beta plays an essential role in the phosphorylation of RelA/p65 on serine*  
1232 *536 induced by lipopolysaccharide*. J Immunol, 2003. **170**(11): p. 5630-5.
- 1233 39. Huang, B., et al., *Brd4 coactivates transcriptional activation of NF-kappaB via specific binding*  
1234 *to acetylated RelA*. Mol Cell Biol, 2009. **29**(5): p. 1375-87.
- 1235 40. Amir-Zilberstein, L., et al., *Differential regulation of NF-kappaB by elongation factors is*  
1236 *determined by core promoter type*. Mol Cell Biol, 2007. **27**(14): p. 5246-59.
- 1237 41. Nowak, D.E., et al., *RelA Ser276 phosphorylation is required for activation of a subset of NF-*  
1238 *kappaB-dependent genes by recruiting cyclin-dependent kinase 9/cyclin T1 complexes*. Mol  
1239 Cell Biol, 2008. **28**(11): p. 3623-38.
- 1240 42. Smale, S.T., *Hierarchies of NF-kappaB target-gene regulation*. Nat Immunol, 2011. **12**(8): p.  
1241 689-94.
- 1242 43. Huang, S.M. and D.J. McCance, *Down regulation of the interleukin-8 promoter by human*  
1243 *papillomavirus type 16 E6 and E7 through effects on CREB binding protein/p300 and P/CAF*. J  
1244 Virol, 2002. **76**(17): p. 8710-21.
- 1245 44. Xing, J., et al., *Herpes simplex virus 1-encoded tegument protein VP16 abrogates the*  
1246 *production of beta interferon (IFN) by inhibiting NF-kappaB activation and blocking IFN*  
1247 *regulatory factor 3 to recruit its coactivator CBP*. J Virol, 2013. **87**(17): p. 9788-801.
- 1248 45. Peng, C., et al., *Myxoma virus M156 is a specific inhibitor of rabbit PKR but contains a loss-of-*  
1249 *function mutation in Australian virus isolates*. Proc Natl Acad Sci U S A, 2016. **113**(14): p. 3855-  
1250 60.
- 1251 46. Elde, N.C. and H.S. Malik, *The evolutionary conundrum of pathogen mimicry*. Nat Rev  
1252 Microbiol, 2009. **7**(11): p. 787-97.

- 1253 47. Daugherty, M.D. and H.S. Malik, *Rules of engagement: molecular insights from host-virus arms*  
1254 *racers*. Annu Rev Genet, 2012. **46**: p. 677-700.
- 1255 48. McFadden, G., *Poxvirus tropism*. Nat Rev Microbiol, 2005. **3**(3): p. 201-13.
- 1256 49. Johnston, J.B. and G. McFadden, *Poxvirus immunomodulatory strategies: current perspectives*.  
1257 J Virol, 2003. **77**(11): p. 6093-100.
- 1258 50. Seet, B.T., et al., *Poxviruses and immune evasion*. Annu Rev Immunol, 2003. **21**: p. 377-423.
- 1259 51. Bahar, M.W., et al., *How vaccinia virus has evolved to subvert the host immune response*. J  
1260 Struct Biol, 2011. **175**(2): p. 127-34.
- 1261 52. Mansur, D.S., et al., *Poxvirus targeting of E3 ligase beta-TrCP by molecular mimicry: a*  
1262 *mechanism to inhibit NF-kappaB activation and promote immune evasion and virulence*. PLoS  
1263 Pathog, 2013. **9**(2): p. e1003183.
- 1264 53. Neidel, S., et al., *Vaccinia virus protein A49 is an unexpected member of the B-cell Lymphoma*  
1265 *(Bcl)-2 protein family*. J Biol Chem, 2015. **290**(10): p. 5991-6002.
- 1266 54. Neidel, S., et al., *NF-kappaB activation is a turn on for vaccinia virus phosphoprotein A49 to*  
1267 *turn off NF-kappaB activation*. Proc Natl Acad Sci U S A, 2019. **116**(12): p. 5699-5704.
- 1268 55. Smith, G.L., et al., *Vaccinia virus immune evasion: mechanisms, virulence and immunogenicity*.  
1269 J Gen Virol, 2013. **94**(Pt 11): p. 2367-2392.
- 1270 56. Albarnaz, J.D., A.A. Torres, and G.L. Smith, *Modulating Vaccinia Virus Immunomodulators to*  
1271 *Improve Immunological Memory*. Viruses, 2018. **10**(3).
- 1272 57. Sumner, R.P., et al., *Vaccinia virus inhibits NF-kappaB-dependent gene expression downstream*  
1273 *of p65 translocation*. J Virol, 2014. **88**(6): p. 3092-102.
- 1274 58. Perkus, M.E., et al., *Deletion of 55 open reading frames from the termini of vaccinia virus*.  
1275 Virology, 1991. **180**(1): p. 406-10.
- 1276 59. Assarsson, E., et al., *Kinetic analysis of a complete poxvirus transcriptome reveals an*  
1277 *immediate-early class of genes*. Proc Natl Acad Sci U S A, 2008. **105**(6): p. 2140-5.
- 1278 60. Yang, Z., et al., *Simultaneous high-resolution analysis of vaccinia virus and host cell*  
1279 *transcriptomes by deep RNA sequencing*. Proc Natl Acad Sci U S A, 2010. **107**(25): p. 11513-8.
- 1280 61. Wentz, S.R. and M.P. Rout, *The nuclear pore complex and nuclear transport*. Cold Spring Harb  
1281 Perspect Biol, 2010. **2**(10): p. a000562.
- 1282 62. Gubser, C., et al., *Poxvirus genomes: a phylogenetic analysis*. J Gen Virol, 2004. **85**(Pt 1): p.  
1283 105-117.
- 1284 63. Ferguson, B.J., et al., *Vaccinia virus protein N2 is a nuclear IRF3 inhibitor that promotes*  
1285 *virulence*. J Gen Virol, 2013. **94**(Pt 9): p. 2070-2081.
- 1286 64. Chen, R.A., et al., *Inhibition of IkappaB kinase by vaccinia virus virulence factor B14*. PLoS  
1287 Pathog, 2008. **4**(2): p. e22.
- 1288 65. Stuart, J.H., et al., *Vaccinia Virus Protein C6 Inhibits Type I IFN Signalling in the Nucleus and*  
1289 *Binds to the Transactivation Domain of STAT2*. PLoS Pathog, 2016. **12**(12): p. e1005955.
- 1290 66. Torres, A.A., et al., *Multiple Bcl-2 family immunomodulators from vaccinia virus regulate*  
1291 *MAPK/AP-1 activation*. J Gen Virol, 2016. **97**(9): p. 2346-2351.
- 1292 67. Yang, Z., et al., *Deciphering poxvirus gene expression by RNA sequencing and ribosome*  
1293 *profiling*. J Virol, 2015. **89**(13): p. 6874-86.
- 1294 68. Yang, Z., et al., *Genome-wide analysis of the 5' and 3' ends of vaccinia virus early mRNAs*  
1295 *delineates regulatory sequences of annotated and anomalous transcripts*. J Virol, 2011. **85**(12):  
1296 p. 5897-909.
- 1297 69. Yuen, L. and B. Moss, *Oligonucleotide sequence signaling transcriptional termination of*  
1298 *vaccinia virus early genes*. Proc Natl Acad Sci U S A, 1987. **84**(18): p. 6417-21.
- 1299 70. Unterholzner, L., et al., *Vaccinia virus protein C6 is a virulence factor that binds TBK-1 adaptor*  
1300 *proteins and inhibits activation of IRF3 and IRF7*. PLoS Pathog, 2011. **7**(9): p. e1002247.
- 1301 71. Soday, L., et al., *Quantitative Temporal Proteomic Analysis of Vaccinia Virus Infection Reveals*  
1302 *Regulation of Histone Deacetylases by an Interferon Antagonist*. Cell Rep, 2019. **27**(6): p. 1920-  
1303 1933 e7.

- 1304 72. Parrish, S. and B. Moss, *Characterization of a vaccinia virus mutant with a deletion of the D10R*  
1305 *gene encoding a putative negative regulator of gene expression*. J Virol, 2006. **80**(2): p. 553-  
1306 61.
- 1307 73. Parrish, S. and B. Moss, *Characterization of a second vaccinia virus mRNA-decapping enzyme*  
1308 *conserved in poxviruses*. J Virol, 2007. **81**(23): p. 12973-8.
- 1309 74. Ehlers, A., et al., *Poxvirus Orthologous Clusters (POCs)*. Bioinformatics, 2002. **18**(11): p. 1544-  
1310 5.
- 1311 75. Tamosiunaite, A., et al., *What a Difference a Gene Makes: Identification of Virulence Factors*  
1312 *of Cowpox Virus*. J Virol, 2020. **94**(2).
- 1313 76. Muhlemann, B., et al., *Diverse variola virus (smallpox) strains were widespread in northern*  
1314 *Europe in the Viking Age*. Science, 2020. **369**(6502).
- 1315 77. Duggan, A.T., et al., *17(th) Century Variola Virus Reveals the Recent History of Smallpox*. Curr  
1316 Biol, 2016. **26**(24): p. 3407-3412.
- 1317 78. Kelley, L.A., et al., *The Phyre2 web portal for protein modeling, prediction and analysis*. Nat  
1318 Protoc, 2015. **10**(6): p. 845-58.
- 1319 79. Lecoq, L., et al., *Structural characterization of interactions between transactivation domain 1*  
1320 *of the p65 subunit of NF-kappaB and transcription regulatory factors*. Nucleic Acids Res, 2017.  
1321 **45**(9): p. 5564-5576.
- 1322 80. Schmitz, M.L., et al., *Structural and functional analysis of the NF-kappa B p65 C terminus. An*  
1323 *acidic and modular transactivation domain with the potential to adopt an alpha-helical*  
1324 *conformation*. J Biol Chem, 1994. **269**(41): p. 25613-20.
- 1325 81. Blair, W.S., et al., *Mutational analysis of the transcription activation domain of RelA:*  
1326 *identification of a highly synergistic minimal acidic activation module*. Mol Cell Biol, 1994.  
1327 **14**(11): p. 7226-34.
- 1328 82. Schmitz, M.L. and P.A. Baeuerle, *The p65 subunit is responsible for the strong transcription*  
1329 *activating potential of NF-kappa B*. EMBO J, 1991. **10**(12): p. 3805-17.
- 1330 83. Shi, J. and C.R. Vakoc, *The mechanisms behind the therapeutic activity of BET bromodomain*  
1331 *inhibition*. Mol Cell, 2014. **54**(5): p. 728-36.
- 1332 84. Devaiah, B.N., A. Geggion, and D.S. Singer, *Bromodomain 4: a cellular Swiss army knife*. J  
1333 Leukoc Biol, 2016. **100**(4): p. 679-686.
- 1334 85. Filippakopoulos, P., et al., *Selective inhibition of BET bromodomains*. Nature, 2010. **468**(7327):  
1335 p. 1067-73.
- 1336 86. Hargreaves, D.C., T. Horng, and R. Medzhitov, *Control of inducible gene expression by signal-*  
1337 *dependent transcriptional elongation*. Cell, 2009. **138**(1): p. 129-45.
- 1338 87. Mochizuki, K., et al., *The bromodomain protein Brd4 stimulates G1 gene transcription and*  
1339 *promotes progression to S phase*. J Biol Chem, 2008. **283**(14): p. 9040-8.
- 1340 88. Richards, K.H., et al., *The human papillomavirus (HPV) E7 protein antagonises an Imiquimod-*  
1341 *induced inflammatory pathway in primary human keratinocytes*. Sci Rep, 2015. **5**: p. 12922.
- 1342 89. Spitkovsky, D., et al., *The human papillomavirus oncoprotein E7 attenuates NF-kappa B*  
1343 *activation by targeting the I kappa B kinase complex*. J Biol Chem, 2002. **277**(28): p. 25576-82.
- 1344 90. Vandermark, E.R., et al., *Human papillomavirus type 16 E6 and E 7 proteins alter NF-kB in*  
1345 *cultured cervical epithelial cells and inhibition of NF-kB promotes cell growth and*  
1346 *immortalization*. Virology, 2012. **425**(1): p. 53-60.
- 1347 91. Pallett, M.A., et al., *Vaccinia Virus BBK E3 Ligase Adaptor A55 Targets Importin-Dependent NF-*  
1348 *kappaB Activation and Inhibits CD8(+) T-Cell Memory*. J Virol, 2019. **93**(10).
- 1349 92. Eaglesham, J.B., et al., *Viral and metazoan poxins are cGAMP-specific nucleases that restrict*  
1350 *cGAS-STING signalling*. Nature, 2019. **566**(7743): p. 259-263.
- 1351 93. Mukherjee, S.P., et al., *Analysis of the RelA:CBP/p300 interaction reveals its involvement in NF-*  
1352 *kappaB-driven transcription*. PLoS Biol, 2013. **11**(9): p. e1001647.
- 1353 94. Wu, S.Y., et al., *Phospho switch triggers Brd4 chromatin binding and activator recruitment for*  
1354 *gene-specific targeting*. Mol Cell, 2013. **49**(5): p. 843-57.



- 1355 95. Kanno, T., et al., *BRD4 assists elongation of both coding and enhancer RNAs by interacting*  
1356 *with acetylated histones*. Nat Struct Mol Biol, 2014. **21**(12): p. 1047-57.
- 1357 96. McCraith, S., et al., *Genome-wide analysis of vaccinia virus protein-protein interactions*. Proc  
1358 Natl Acad Sci U S A, 2000. **97**(9): p. 4879-84.
- 1359 97. Staller, M.V., et al., *A High-Throughput Mutational Scan of an Intrinsically Disordered Acidic*  
1360 *Transcriptional Activation Domain*. Cell Syst, 2018. **6**(4): p. 444-455 e6.
- 1361 98. Bravo Cruz, A.G. and J.L. Shisler, *Vaccinia virus K1 ankyrin repeat protein inhibits NF-kappaB*  
1362 *activation by preventing RelA acetylation*. J Gen Virol, 2016. **97**(10): p. 2691-2702.
- 1363 99. Shisler, J.L. and X.L. Jin, *The vaccinia virus K1L gene product inhibits host NF-kappaB activation*  
1364 *by preventing I kappa B alpha degradation*. J Virol, 2004. **78**(7): p. 3553-60.
- 1365 100. Diel, D.G., et al., *A nuclear inhibitor of NF-kappaB encoded by a poxvirus*. J Virol, 2011. **85**(1):  
1366 p. 264-75.
- 1367 101. Ning, Z., et al., *The N terminus of orf virus-encoded protein 002 inhibits acetylation of NF-*  
1368 *kappaB p65 by preventing Ser(276) phosphorylation*. PLoS One, 2013. **8**(3): p. e58854.
- 1369 102. O'Connor, M.J., et al., *Characterization of an E1A-CBP interaction defines a novel*  
1370 *transcriptional adapter motif (TRAM) in CBP/p300*. J Virol, 1999. **73**(5): p. 3574-81.
- 1371 103. Marzio, G., et al., *HIV-1 tat transactivator recruits p300 and CREB-binding protein histone*  
1372 *acetyltransferases to the viral promoter*. Proc Natl Acad Sci U S A, 1998. **95**(23): p. 13519-24.
- 1373 104. Nicot, C. and R. Harrod, *Distinct p300-responsive mechanisms promote caspase-dependent*  
1374 *apoptosis by human T-cell lymphotropic virus type 1 Tax protein*. Mol Cell Biol, 2000. **20**(22):  
1375 p. 8580-9.
- 1376 105. Patel, D., et al., *The E6 protein of human papillomavirus type 16 binds to and inhibits co-*  
1377 *activation by CBP and p300*. EMBO J, 1999. **18**(18): p. 5061-72.
- 1378 106. Eckner, R., et al., *Association of p300 and CBP with simian virus 40 large T antigen*. Mol Cell  
1379 Biol, 1996. **16**(7): p. 3454-64.
- 1380 107. Cook, J.L., et al., *Role of the E1A Rb-binding domain in repression of the NF-kappa B-dependent*  
1381 *defense against tumor necrosis factor-alpha*. Proc Natl Acad Sci U S A, 2002. **99**(15): p. 9966-  
1382 71.
- 1383 108. Richardson, P.M. and T.D. Gilmore, *vRel is an inactive member of the Rel family of*  
1384 *transcriptional activating proteins*. J Virol, 1991. **65**(6): p. 3122-30.
- 1385 109. Sun, S.C., et al., *NF-kappa B controls expression of inhibitor I kappa B alpha: evidence for an*  
1386 *inducible autoregulatory pathway*. Science, 1993. **259**(5103): p. 1912-5.
- 1387 110. Lin, J.R., et al., *Minimalist ensemble algorithms for genome-wide protein localization*  
1388 *prediction*. BMC Bioinformatics, 2012. **13**: p. 157.
- 1389 111. Kall, L., A. Krogh, and E.L. Sonnhammer, *A combined transmembrane topology and signal*  
1390 *peptide prediction method*. J Mol Biol, 2004. **338**(5): p. 1027-36.
- 1391 112. Robert, X. and P. Gouet, *Deciphering key features in protein structures with the new ENDscript*  
1392 *server*. Nucleic Acids Res, 2014. **42**(Web Server issue): p. W320-4.
- 1393 113. Gloeckner, C.J., et al., *A novel tandem affinity purification strategy for the efficient isolation*  
1394 *and characterisation of native protein complexes*. Proteomics, 2007. **7**(23): p. 4228-34.
- 1395 114. Maluquer de Motes, C., et al., *Vaccinia virus virulence factor N1 can be ubiquitylated on*  
1396 *multiple lysine residues*. J Gen Virol, 2014. **95**(Pt 9): p. 2038-2049.
- 1397 115. Falkner, F.G. and B. Moss, *Transient dominant selection of recombinant vaccinia viruses*. J  
1398 Virol, 1990. **64**(6): p. 3108-11.
- 1399 116. Joklik, W.K., *The purification fo four strains of poxvirus*. Virology, 1962. **18**: p. 9-18.
- 1400 117. Tschärke, D.C. and G.L. Smith, *A model for vaccinia virus pathogenesis and immunity based on*  
1401 *intra-dermal injection of mouse ear pinnae*. J Gen Virol, 1999. **80** ( Pt 10): p. 2751-2755.
- 1402 118. Williamson, J.D., et al., *Biological characterization of recombinant vaccinia viruses in mice*  
1403 *infected by the respiratory route*. J Gen Virol, 1990. **71** ( Pt 11): p. 2761-7.

- 1404 119. Harris, D.P., et al., *Tumor necrosis factor (TNF)-alpha induction of CXCL10 in endothelial cells*  
1405 *requires protein arginine methyltransferase 5 (PRMT5)-mediated nuclear factor (NF)-kappaB*  
1406 *p65 methylation*. J Biol Chem, 2014. **289**(22): p. 15328-39.
- 1407 120. Xu, X., et al., *EVI1 acts as an inducible negative-feedback regulator of NF-kappaB by inhibiting*  
1408 *p65 acetylation*. J Immunol, 2012. **188**(12): p. 6371-80.
- 1409
